1           **A phospho-switch at Acinus-Serine<sup>437</sup> controls autophagic**  
2           **responses to Cadmium exposure and neurodegenerative stress.**  
3

4  
5           **Nilay Nandi<sup>1</sup>, Zuhair Zaidi<sup>1</sup>, Charles Tracy<sup>1</sup> and Helmut Krämer<sup>1,2,#</sup>**  
6

7           <sup>1</sup> Department of Neuroscience and <sup>2</sup> Department of Cell Biology,  
8           UT Southwestern Medical Center,  
9           Dallas, TX 75390-9111, USA.

10  
11  
12           # Lead contact:       Helmut Krämer  
13                                Phone:    1-(214) 648 1860  
14                                Fax:        1-(214) 648 1801  
15                                email:     [helmut.kramer@utsouthwestern.edu](mailto:helmut.kramer@utsouthwestern.edu)  
16  
17  
18  
19

## 20 **Summary:**

21       Neuronal health depends on quality control functions of autophagy, but mechanisms  
22 regulating neuronal autophagy are poorly understood. Previously, we showed that in  
23 *Drosophila* starvation-independent quality control autophagy is regulated by Acinus and the  
24 Cdk5-dependent phosphorylation of its serine<sup>437</sup> (Nandi et al., 2017). Here, we identify the  
25 phosphatase that counterbalances this activity and provides for the dynamic nature of  
26 Acinus-S437 phosphorylation. A genetic screen identified six phosphatases that genetically  
27 interacted with an Acinus gain-of-function model. Among these, loss of function of only one,  
28 the PPM-type phosphatase Nil (CG6036), enhanced pS437-Acinus levels. Cdk5-dependent  
29 phosphorylation of Acinus serine<sup>437</sup> in *nil*<sup>1</sup> animals elevates neuronal autophagy and reduces  
30 the accumulation of polyQ proteins in a *Drosophila* Huntington's disease model. Consistent  
31 with previous findings that Cd<sup>2+</sup> inhibits PPM-type phosphatases, Cd<sup>2+</sup>-exposure elevated  
32 Acinus-serine<sup>437</sup> phosphorylation which was necessary for increased neuronal autophagy  
33 and protection against Cd<sup>2+</sup>-induced cytotoxicity. Together, our data establish the Acinus-  
34 S437 phospho-switch as critical integrator of multiple stress signals regulating neuronal  
35 autophagy.

36

37

38 **Keywords:** Autophagy, Acinus, metal-dependent phosphatases, Cd<sup>2+</sup> toxicity, *Drosophila*,  
39 PolyQ proteins, Proteostatic Stress

40

41

## 42 **Introduction**

43       A key process for maintaining cellular fitness is autophagy, here short for  
44 macroautophagy (Fleming and Rubinsztein, 2020; Menzies et al., 2015). Starvation induces  
45 non-selective autophagy which contributes to reclaiming molecular building blocks (Levine  
46 and Kroemer, 2019). In neurons and other long-lived cells, quality control of proteins and  
47 organelles is an additional critical function of autophagy (Dong et al., 2021; Evans and  
48 Holzbaur, 2020; Kroemer et al., 2010). The importance of the quality control function of  
49 starvation-independent basal autophagy was demonstrated by mutations in core autophagy  
50 components in mice and flies: cell-type specific loss of Atg5 or Atg7 triggers rapid  
51 neurodegeneration (Hara et al., 2006; Juhasz et al., 2007; Komatsu et al., 2006) or cardiac  
52 hypertrophy (Nakai et al., 2007). Moreover, elevated basal autophagy can successfully  
53 reduce the polyQ load in models of Huntington's disease or spinocerebellar ataxia type 3  
54 (SCA3) and reduce neurodegeneration (Bilen and Bonini, 2007; Jaiswal et al., 2012; Nandi

55 et al., 2014, 2017; Ravikumar et al., 2004). Both modes of autophagy use core autophagy  
56 proteins to initiate the generation of isolation membranes (also known as phagophores),  
57 promote their growth to autophagosomes, and finally promote their fusion with lysosomes or  
58 late endosomes to initiate degradation of captured content (Mizushima, 2017). Although the  
59 rapid induction of autophagy in response to nutrient deprivation is well described (Galluzzi et  
60 al., 2017), much less is known about the modulation of basal levels of autophagy in  
61 response to cellular stress.

62 We previously identified Acinus (Acn) as a regulator of starvation-independent quality  
63 control autophagy in *Drosophila* (Haberman et al., 2010; Nandi et al., 2014, 2017). Acn is a  
64 conserved protein enriched in the nucleus and, together with Sap18 and RNPS1, forms the  
65 ASAP complex (Murachelli et al., 2012; Schwerk et al., 2003). The ASAP complex can  
66 regulate alternative splicing by interacting with the exon junction complex, spliceosomes and  
67 messenger ribonucleoprotein particles (Hayashi et al., 2014; Malone et al., 2014; Tang et al.,  
68 1995). In mammals and *Drosophila*, Acn levels are regulated by its Akt1-dependent  
69 phosphorylation which inhibits caspase-mediated cleavage (Hu et al., 2005; Nandi et al.,  
70 2014). Furthermore, Acn stability is enhanced by Cdk5-mediated phosphorylation of the  
71 conserved Serine-437. Acn levels are elevated by the phospho-mimetic Acn<sup>S437D</sup> mutation  
72 and reduced by the phospho-inert Acn<sup>S437A</sup> (Nandi et al., 2017). The stress-responsive  
73 Cdk5/p35 kinase complex (Su and Tsai, 2011) regulates multiple neuronal functions  
74 including synapse homeostasis and axonal transport (Klinman and Holzbaur, 2015; Lai and  
75 Ip, 2015; McLinden et al., 2012), in addition to its role in autophagy (Nandi and Krämer,  
76 2018; Shukla and Giniger, 2019). Phosphorylation-induced stabilization of Acn increases  
77 basal, starvation-independent autophagy with beneficial consequences including reduced  
78 polyQ load in a *Drosophila* Huntington's disease model and prolonged life span (Nandi et al.,  
79 2014, 2017). The detailed mechanism by which Acn regulates autophagy is not well  
80 understood, but is likely to involve the activation of Atg1 kinase activity as autophagy-related  
81 and unrelated functions of Atg1 are enhanced by elevated Acn levels (Nandi et al., 2014,  
82 2017; Tyra et al., 2020). Identification of Acn in a high-content RNAi screen for genes  
83 promoting viral autophagy in mammals (Orvedahl et al., 2011) suggests a conserved role in  
84 regulating starvation-independent autophagy.

85 Detailed examination of the cell type-specific changes in levels and phosphorylation of  
86 Acn in photoreceptor neurons of developing larval eye discs revealed a highly dynamic  
87 pattern (Nandi et al., 2014, 2017). This motivated us to investigate the role of serine-  
88 threonine phosphatases in counteracting Cdk5/p35 kinase-mediated Acn phosphorylation. In  
89 a targeted screen, we identified CG6036, a member of the PPM family of protein  
90 phosphatases as critical for controlling the phospho-switch on Acn-S437. PPM-type  
91 phosphatases are dependent on Mg<sup>2+</sup> or Mn<sup>2+</sup> as co-factor for their activity (Kamada et al.,

92 2020). They are not inhibited by the broad-spectrum phosphatase inhibitor okadaic acid, in  
93 contrast to PPP-type phosphatases and do not require the regulatory subunits characteristic  
94 for PPP-type phosphatases. Instead, the PPM family contains additional domains and  
95 conserved motifs, which can determine its substrate specificity (Andreeva and Kutuzov,  
96 2001; Shi, 2009; Tong et al., 1998). Intriguingly, PPM family members play a pivotal role in  
97 different physiological or pathological processes that are responsive to cellular stress  
98 signaling, including regulation of AMPK (Davies et al., 1995), Tak1 (Hanada et al., 2001), or  
99 other MAP kinases (Hanada et al., 1998; Maeda et al., 1994; Shiozaki et al., 1994;  
100 Takekawa et al., 1998).

101 Our findings indicate that the CG6036 phosphatase, through its effect on Acn  
102 phosphorylation, regulates neuronal responses to proteostasis or toxicological stress. We  
103 renamed this phosphatase "Nilkantha" (Nil) and from here on will refer to the CG6036  
104 phosphatase as Nil.

105

## 106 **Results:**

### 107 **Nil phosphatase regulates phosphorylation of the conserved serine 437 of Acn.**

108 To identify phosphatases responsible for modulating Acn function, we performed a  
109 targeted RNAi screen of the 37 non CTD-type serine-threonine phosphatases encoded in  
110 the *Drosophila* genome (Supplemental Table 1). To test the effect of these phosphatases on  
111 Acn function, we used an eye-specific sensitized genetic system. GMR-Gal4-driven  
112 expression of UAS-Acn<sup>WT</sup> at 28°C yields a rough-eye phenotype (Figure 1A), that is modified  
113 by genetic enhancers or suppressors (Nandi et al., 2014, 2017). We reasoned that knocking  
114 down a phosphatase responsible for dephosphorylating Acn would elevate the levels of  
115 phosphorylated Acn and hence stabilize the Acn protein, resulting in an enhancement of the  
116 eye roughness induced by UAS-Acn<sup>WT</sup>. Among the serine-threonine phosphatases encoded  
117 by the *Drosophila* genome, RNAi lines targeting *CG6036*, *CG15035*, *PpD6*, *Pp1-13C*,  
118 *flapwing (flw)* and *microtubule star (mts)* exhibited enhancement of Acn-induced eye  
119 roughness yielding a severely rough and reduced eye (Figure 1A-G, Supplemental Table 1,  
120 Figure 1-figure supplement 1). By contrast, expression of these RNAi transgenes by  
121 themselves did not result in visible eye phenotypes (Figure 1H-N, Supplemental Table 1).

122 To test whether these genetic interactions reflect direct effects on the phosphorylation  
123 status of Acn, we used a phospho-specific antibody raised against pS437-Acn (Nandi et al.,  
124 2017) to stain eye discs in which these phosphatases had been knocked down using the  
125 ubiquitously expressed Da-Gal4 driver. No change in Acn phosphorylation resulted from  
126 knockdown of the phosphatases *Pp1-13C*, *PpD6*, or *CG15035* (Figure 1O-R). By contrast,

127 eye discs with *flw* knockdown displayed an altered pattern of pS437-Acn positive cells  
 128 (Figure 1S). Moreover, knocking down *mts* with Da-Gal4 resulted in larval lethality.

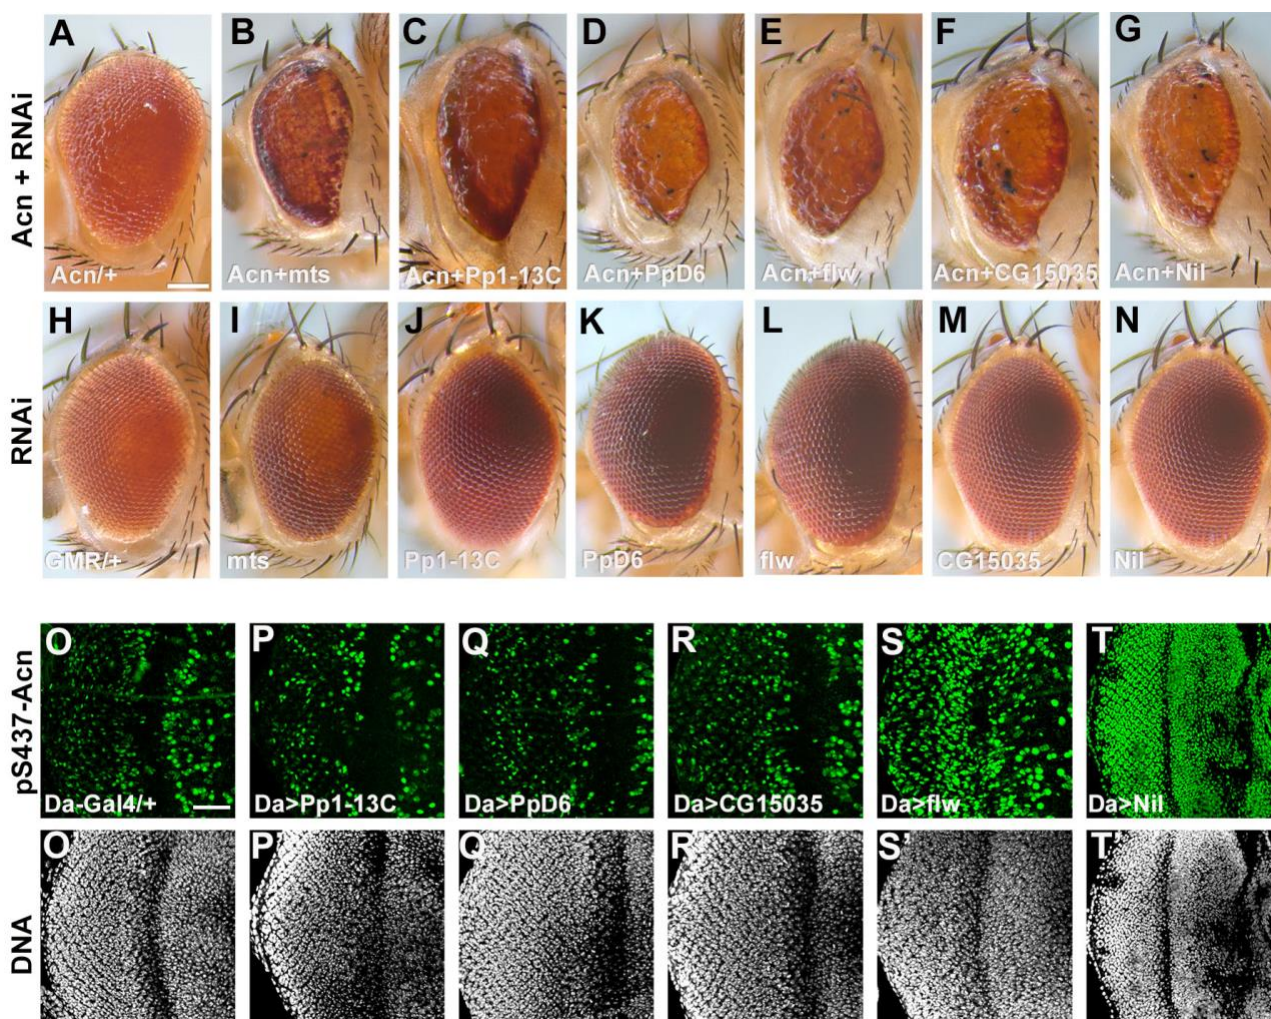

129  
 130 **Figure 1. A genetic screen identifies Nil as the Acinus-S437 phosphatase.**  
 131 (A–N) Micrographs of eyes in which GMR-Gal4 drives expression of Acn<sup>WT</sup> (A), Acn<sup>WT</sup> + *mts*-RNAi  
 132 (B), Acn<sup>WT</sup> + Pp1-13C RNAi (C), Acn<sup>WT</sup> + PpD6 RNAi (D), Acn<sup>WT</sup> + *flw* RNAi (E), Acn<sup>WT</sup> +  
 133 CG15035 RNAi (F), Acn<sup>WT</sup> + *nil* RNAi (G), *mts*-RNAi (I), Pp1-13C-RNAi (J), PpD6-RNAi (K),  
 134 *flw*-RNAi (L), CG15035-RNAi (M), *nil*-RNAi (N) and H represents GMR-Gal4 control.  
 135 (O–T) Projection of confocal micrographs of larval eye discs stained for pS437-Acn (green) and DNA  
 136 from Da-Gal4 (O, O'), Da-Gal4, Pp1-13C RNAi (P, P'), Da-Gal4, PpD6 RNAi (Q, Q'), Da-Gal4, *flw*  
 137 RNAi (R, R'), Da-Gal4, CG15035 RNAi (S, S'), Da-Gal4, *nil* RNAi (T, T').

138 Scale bar in A is 100  $\mu$ m for A–N, scale bar in O is 40  $\mu$ m for O–T. Genotypes are listed in  
 139 Supplemental Table 3.

140

141 Interestingly, the PP2A phosphatase *Mts*, a member of the STRIPAK complex, and the  
 142 PP1 phosphatase *Flw* regulate upstream components of Hippo/Yorkie signaling (Gil-Ranedo  
 143 et al., 2019; Neal et al., 2020; Ribeiro et al., 2010; Yang et al., 2012). Furthermore, Yorkie's

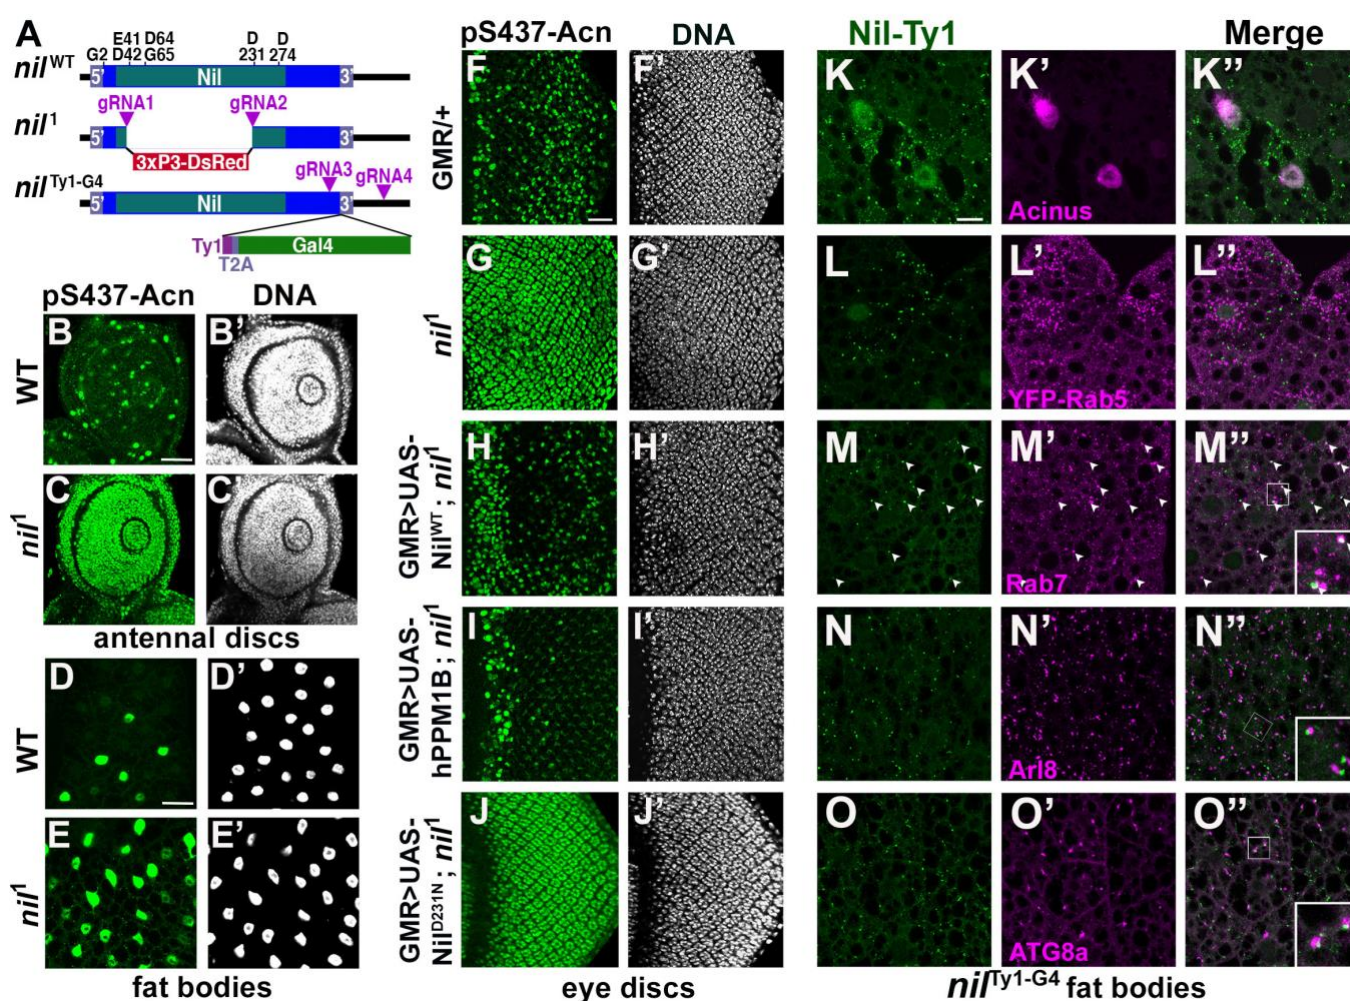

144 **Figure 2. Nil loss and gain-of-function regulates Acinus phosphorylation.**

145 (A) Diagram depicting the Nil<sup>WT</sup> protein with amino acids highly conserved in the PPM family of  
 146 phosphatases, the *nil<sup>l</sup>* allele with its 3xP3-DsRed insertion and the multicistronic *nil<sup>Ty1-G4</sup>* allele  
 147 with Ty1 tag and T2A-co-expressed Gal4.

148 (B–E) Projection of confocal micrographs of larval antennal discs (B, C) and fat bodies (D, E) stained  
 149 for pS437-Acn (green) and DNA from *w<sup>1118</sup>* and *nil<sup>l</sup>*.

150 (F–J) Projection of confocal micrographs of larval eye discs stained for pS437-Acn (green) and DNA  
 151 from GMR-Gal4/+ (F, F'), *nil<sup>l</sup>* (G, G'), GMR-Gal4, UAS-Nil<sup>WT</sup>; *nil<sup>l</sup>* (H, H'), GMR-Gal4, UAS-  
 152 hPPM1B; *nil<sup>l</sup>* (I, I'), GMR-Gal4, UAS-Nil<sup>D231N</sup>; *nil<sup>l</sup>* (J, J').

153 (K–O) Projection of confocal micrographs of larval fat bodies from *nil<sup>Ty1-G4</sup>* all stained for Ty1(green)  
 154 and Acn (magenta) (K- K''), YFP-Rab5 (magenta) (L-L''), Rab7 (magenta) (M-M''), Arl8  
 155 (magenta) (N- N''), or Atg8a (magenta) (O-O''). Arrowheads in M-M'' indicate colocalization of  
 156 Nil-Ty1 with Rab7 in cytosolic punctae. Notice that projections in L to O represent apical regions  
 157 largely excluding nuclei. Scale bar in B is 40 μm for B-E and in F is 20 μm for F-O. Genotypes are  
 158 listed in Supplemental Table 3.

159

160 growth promoting activity is regulated by Acn activity (Tyra et al., 2020). Taken together, this  
 161 suggests that the strong genetic interactions of Acn with the Mts and Flw phosphatases

162 might reflect additive effects on Yorkie activity rather than direct effects on Acn  
163 phosphorylation.

164 By contrast, knock down of Nil (CG6036) yielded a dramatic enhancement of Acn  
165 phosphorylation at serine<sup>437</sup> compared to wild-type controls (Figure 1O,T). Given this robust  
166 increase of Acn phosphorylation, we further explored the role of Nil in regulating Acn function.

167 Nil is a member of the PPM family of phosphatases characterized by multiple conserved  
168 acidic residues (Figure 2A) that contribute to a binuclear metal center critical for  
169 phosphatase activity (Das et al., 1996; Pan et al., 2013). To further test the role of the Nil  
170 phosphatase in regulating Acn-S437 phosphorylation, we used CRISPR-Cas9 to generate  
171 the *nil*<sup>l</sup> deletion allele that eliminates the majority of the conserved phosphatase domain  
172 (Figure 2A). Antennal discs and larval fat bodies from *nil*<sup>l</sup> wandering larvae displayed a  
173 dramatic increase in Acn-S437 phosphorylation compared to wild-type controls (Figure 2B-  
174 E). A similar robust enhancement of pS437-Acn staining was seen in *nil*<sup>l</sup> mutant eye discs  
175 compared to the controls (Figure 2F,G). Overexpressing wild-type Nil or the human PPM1B  
176 homolog of Nil restored phosphatase activity in *nil*<sup>l</sup> mutant eye discs (Figure 2H,I). Multiple  
177 sequence alignment pointed to aspartate-231 of Nil as an acidic residue critical for metal  
178 binding and phosphatase activity (Kamada et al., 2020). Mutation of this aspartate residue to  
179 asparagine generated the Nil<sup>D231N</sup> point mutant; its expression in *nil*<sup>l</sup> mutant eye discs failed  
180 to restore phosphatase activity (Figure 2J). Moreover, the rough-eye phenotype induced by  
181 Acn overexpression using the GMR-Gal4 driver was suppressed by co-expression of wild-  
182 type Nil, but not Nil<sup>D231N</sup> (Figure 2-figure supplement 1A-F). Additionally, overexpression of  
183 wild-type Nil, but not the inactive Nil<sup>D231N</sup> mutant, in larval eye discs reduced pS437-Acn  
184 levels compared to GMR-Gal4 only controls (Figure 2-figure supplement 1G-I).

### 185 **Nil phosphatase localizes to the nucleus and to endo-lysosomal compartments.**

186 To gain insights in how this phosphatase can regulate Acn phosphorylation and function  
187 we examined its subcellular localization. We generated the *nil*<sup>Ty1-G4</sup> allele expressing Ty1-  
188 tagged Nil phosphatase and Gal4 under control of endogenous nil promoter (Figure 2A,  
189 Figure 2-figure supplement 2F). To examine localization of the Nil phosphatase we stained  
190 *nil*<sup>Ty1-G4</sup> animals using antibodies against the Ty1 tag. Consistent with the previously reported  
191 low expression levels (Brown et al., 2014), we could barely detect Ty1-tagged Nil  
192 phosphatase in eye discs of wandering third instar larvae (Figure 2-figure supplement 2A,B).  
193 However, Ty1-tagged Nil phosphatase was abundant in nuclei of third instar larval fat bodies

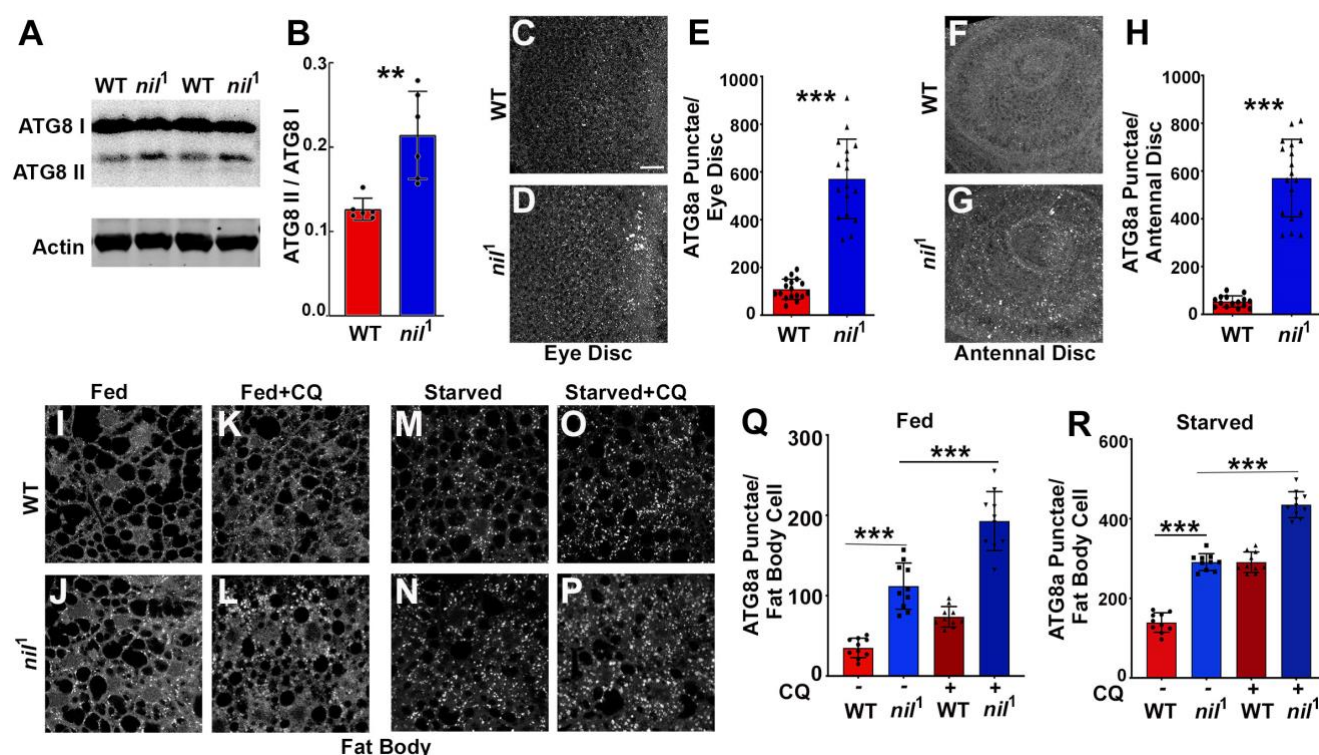

194

195 **Figure 3. Loss of Nil enhances autophagic flux**

196 (A-B) Western blot of lysates from adult heads of *w<sup>1118</sup>* and *nil<sup>1</sup>* probed for ATG8a (A). Quantification  
 197 of ATG8a-II to ATG8a-I ratio from Western blots as in A. Data are from 6 different lysates from  
 198 three experimental repeats. Bar graphs show mean  $\pm$ SD. \*\**p*<0.01 (B).

199 (C-E) Projection of confocal micrographs of fed *w<sup>1118</sup>* and *nil<sup>1</sup>* larval eye discs (C, D) stained for  
 200 Atg8a. (E) Quantification of Atg8a punctae in eye discs (C, D) of fed *w<sup>1118</sup>* and *nil<sup>1</sup>*. Data are from  
 201 15 larvae taken from three experimental repeats. Bar graphs show mean  $\pm$ SD. \*\*\**p*<0.001.

202 (F-H) Projection of confocal micrographs of fed *w<sup>1118</sup>* and *nil<sup>1</sup>* antennal discs (F, G) stained for Atg8a.  
 203 (H) Quantification of Atg8a punctae in antennal discs (F, G) of fed *w<sup>1118</sup>* and *nil<sup>1</sup>*. Data are from  
 204 15 larvae from three experimental repeats. Bar graphs show mean  $\pm$ SD. \*\*\**p*<0.001.

205 (I-P) Projection of confocal micrographs encompassing 6 to 8 cells of *w<sup>1118</sup>* and *nil<sup>1</sup>* larval fat bodies  
 206 aged 96 h after egg laying, either fed (I-L) or amino-acid starved for 4h in 20% sucrose solution  
 207 (M-P) stained for Atg8a. Larvae were matched for size. To assess autophagic flux, for panels K, L  
 208 and O, P lysosomal degradation was inhibited with chloroquine (CQ).

209 (Q-R) Quantification of Atg8a punctae in fed (Q) or starved (R) *w<sup>1118</sup>* and *nil<sup>1</sup>* larval fat bodies  
 210 averaged from six to eight cells each. Data are from 10 larvae from three experimental  
 211 repeats. Bar graphs show mean  $\pm$ SD. \*\*\**p*<0.001.

212 Scale bar in C is 20  $\mu$ m for C-D, F-G, I-P. Genotypes are listed in Supplemental Table 3.

213

214 (Figure 2-figure supplement 2C-E), consistent with its role in regulating phosphorylation of  
 215 the primarily nuclear Acn protein (Haberman et al., 2010; Nandi et al., 2014, 2017). Co-  
 216 staining of third instar larval fat bodies of *nil<sup>1</sup>Y1-G4* larvae indicated expression of endogenous  
 217 Nil phosphatase in Acn-positive nuclei (Figure 2K). Moreover, cytosolic punctae positive for



218 the Nil phosphatase prompted us to examine its possible localization to endo-lysosomal  
219 compartments. We compared Nil localization to that of the early endosomal marker YFP-  
220 Rab5 (Dunst et al., 2015), but we found no co-localization of Ty1-positive Nil phosphatase  
221 punctae with YFP-Rab5 (Figure 2L). We further co-stained *nil*<sup>Ty1-G4</sup> larval fat bodies with  
222 antibodies against Ty1 and Rab7, Arl8 or ATG8a. Rab7 marks late endosomes (Numrich  
223 and Ungermann, 2014), Arl8 lysosomes (Rosa-Ferreira et al., 2018) and ATG8a  
224 autophagosomes and early autolysosomes (Klionsky et al., 2016). We observed many of the  
225 prominent Ty1-stained Nil phosphatase punctae to colocalize with Rab7 (arrowheads in  
226 Figure 2M) or to be adjacent to Arl8-marked lysosomes and Atg8a-marked  
227 autophagosomes/autolysosomes (Figure 2N,O). This localization suggested a possible  
228 involvement of the Nil phosphatase in regulating components of endo-lysosomal or  
229 autophagic trafficking (2K-O, Figure 2-figure supplement 2) consistent with our previously  
230 described role of Acn in this pathway (Nandi and Krämer, 2018).

### 231 **Phosphorylation of Acn Serine 437 in *nil*<sup>l</sup> animal elevates basal autophagy.**

232 Increased Acn-S437 phosphorylation elevates the level of basal, starvation-independent  
233 autophagy (Nandi et al., 2017). We therefore tested whether *nil*<sup>l</sup> null animals exhibited  
234 increased levels of autophagy. Consistent with increased autophagy, *nil*<sup>l</sup> displayed  
235 increased ratio of lipidated Atg8a-II to Atg8a-I (Figure 3A,B). Furthermore, we examined  
236 endogenous Atg8a in eye and antennal discs of fed wandering third instar larvae. We  
237 observed higher numbers of Atg8a-positive punctae in *nil*<sup>l</sup> imaginal discs compared to wild  
238 type, possibly indicating elevated levels of autophagy (Figure 3C-H). Larval fat bodies are a  
239 well-established model in *Drosophila* for investigating autophagy (Rusten et al., 2004; Scott  
240 et al., 2004). In fat bodies of fed 96 hr larvae, we observed few Atg8a-positive punctae but  
241 their number increased upon a 4-hr amino acid starvation (Figure 3I,M,Q,R). However,  
242 numerous ATG8a-positive structures were found in fed *nil*<sup>l</sup> larval fat bodies (Figure 3J,Q)  
243 and their abundance further increased on starvation (Figure 3N,R).

244 The increased number of ATG8a punctae in *nil*<sup>l</sup> animals may either represent a failure  
245 of autophagosomes to fuse with lysosomes, or an enhanced autophagy induction and flux.  
246 To distinguish between these possibilities, we inhibited lysosomal acidification and  
247 degradation with chloroquine (Mauvezin et al., 2014). For starved wild-type and *nil*<sup>l</sup> larval fat  
248 bodies, chloroquine treatment further elevated ATG8a staining after starvation, consistent  
249 with enhanced autophagy flux in these starved tissues (Figure 3O,P,R). Most importantly,

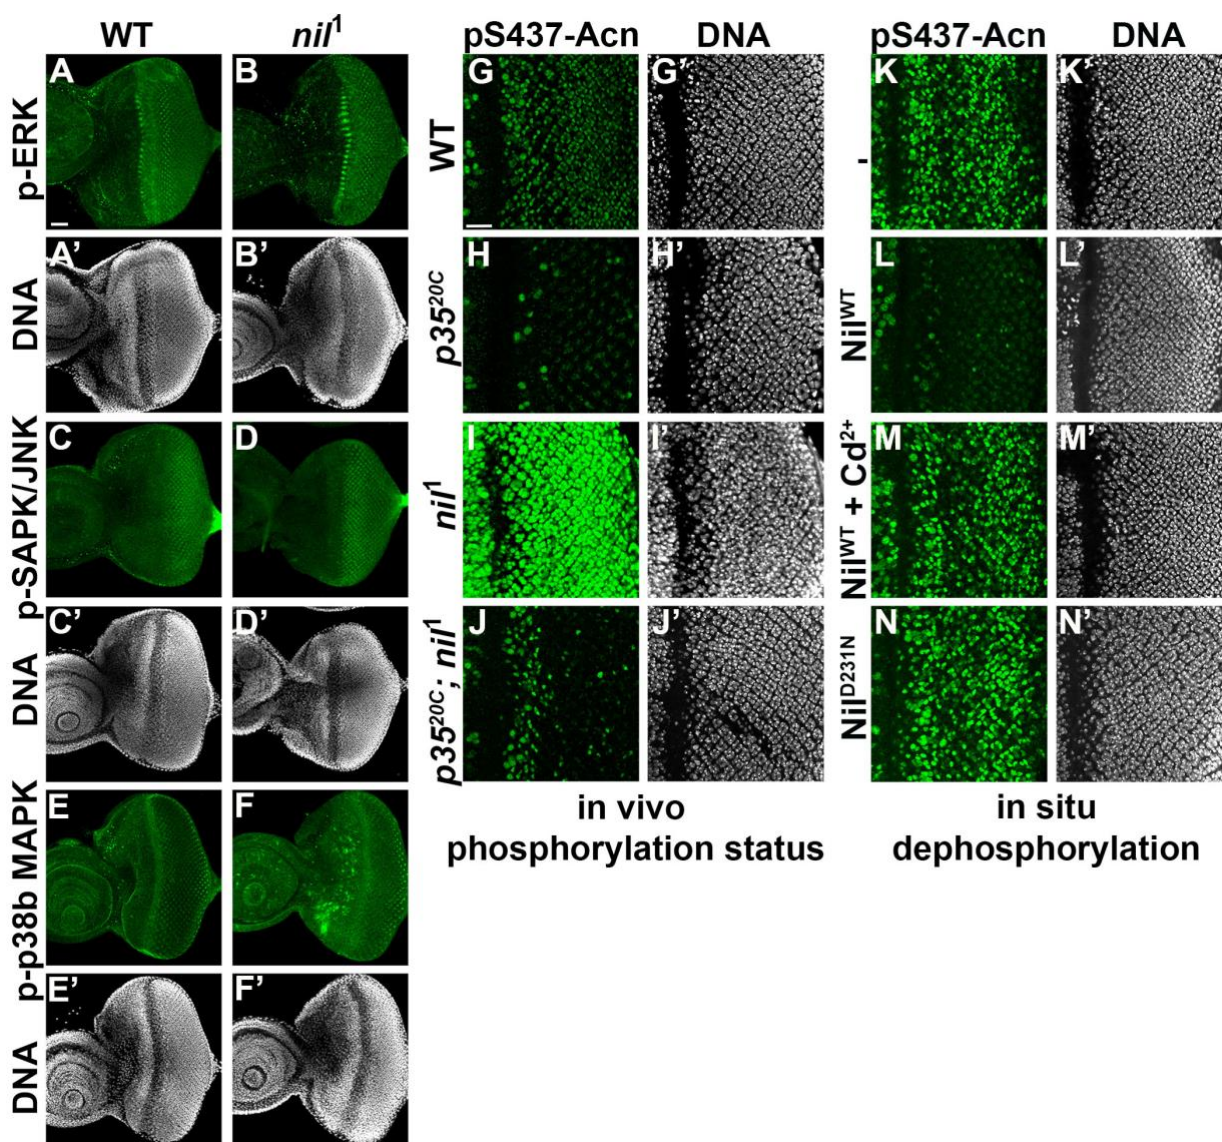

250  
 251 **Figure 4. Nil dephosphorylates Acinus counteracting Cdk5-p35-mediated phosphorylation.**  
 252 (A–F) Projection of confocal micrographs of *w*<sup>1118</sup> and *nil*<sup>1</sup> larval eye discs stained for p-ERK (green)  
 253 and DNA (A–B'), p-SAPK/JNK (green) and DNA (C–D'), p-p38b MAPK (green) and DNA (E–F').  
 254 (G–J) Projection of confocal micrographs of larval eye discs stained for pS437-Acn (green) and DNA  
 255 from *w*<sup>1118</sup> (G, G'), *p35*<sup>20C</sup> (H, H'), *nil*<sup>1</sup> (I, I'), *p35*<sup>20C</sup>; *nil*<sup>1</sup> (J, J').  
 256 (K–N) Projection of confocal micrographs of eye discs from Acn<sup>WT</sup> larvae stained for pS437-Acn  
 257 (green) and DNA without (K, K') or after in-situ dephosphorylation with wild-type Nil (L, L'),  
 258 wild-type Nil + 100 μM CdCl<sub>2</sub> (M, M'), or inactive Nil<sup>D231N</sup> (N, N').  
 259 Scale bar in A is 40 μm for A–F. Scale bar in G is 20 μm for G–N. Genotypes are listed in  
 260 Supplemental Table 3.  
 261  
 262 treating fed 96-hr larval fat bodies of *nil*<sup>1</sup> animals with chloroquine significantly enhanced the  
 263 number of ATG8a positive punctae demonstrating an elevated autophagic flux (Figure  
 264 3K, L, Q). Enhanced autophagic flux in *nil*<sup>1</sup> animals in which phosphorylation of Acn S437 is

265 robustly elevated is consistent with our previous work, that showed by several methods that  
266 phosphorylation of this residue elevates autophagic flux (Nandi et al., 2017).

### 267 **Cdk5-p35 kinase complex triggers Acn S437 phosphorylation in *nil*<sup>l</sup> animal.**

268 PPM1-type serine-threonine phosphatases can negatively regulate stress-responsive  
269 MAPK kinase cascades by directly dephosphorylating and thereby deactivating MAP kinases  
270 or MAPK activating kinases (Hanada et al., 1998; Takekawa et al., 1998). Therefore, we  
271 examined a possible role of the Nil phosphatase in regulating the activity of the MAPK  
272 cascades and their possible involvement in phosphorylating Acn-S437 in *nil*<sup>l</sup> mutants. We  
273 examined phosphorylation of three MAP Kinase family members: ERK, SAPK/JNK and p38b  
274 MAPK in larval eye discs of *nil*<sup>l</sup> animals. We did not observe changes in phosphorylation of  
275 ERK or SAPK/JNK in *nil*<sup>l</sup> eye-antennal discs compared to wild type (Figure 4A-D).  
276 p38bMAPK exhibited elevated phosphorylation in some undifferentiated cells anterior to the  
277 morphogenetic furrow, but not in the developing photoreceptor neurons of *nil*<sup>l</sup> eye disc  
278 compared to wild type (Figure 4E-F). Furthermore, we have demonstrated earlier that  
279 phosphorylation of Acn-S437 remains unchanged in *p38b* mutant eye discs compared to  
280 wild type (Nandi et al., 2017), arguing against an involvement of p38b MAPK in regulating  
281 Acn phosphorylation at serine 437 in *nil*<sup>l</sup> animals.

282 By contrast, the Cdk5-p35 kinase complex can directly phosphorylate Acn-S437 (Nandi  
283 et al., 2017). To further test whether kinases other than Cdk5-p35 contribute to elevated  
284 pS437-Acn in *nil*<sup>l</sup> animals, we examined Acn S437 phosphorylation in *nil*<sup>l</sup>; *p35*<sup>20C</sup> double  
285 mutants. With the exception of dividing cells close to the morphogenetic furrow, *nil*<sup>l</sup>; *p35*<sup>20C</sup>  
286 double mutant eye discs failed to display the pS437-Acn levels (Figure 4J) observed in *nil*<sup>l</sup>  
287 eye discs (Figure 4I) and instead were similar to *p35*<sup>20C</sup> mutants (Figure 4H,J). Taken  
288 together, these data indicate that the Nil phosphatase counteracts Acn-phosphorylation by  
289 the Cdk5-p35 kinase complex rather than inactivating a stress-responsive MAPK.

### 290 **Nil phosphatase contributes to Cd<sup>2+</sup> toxicity and neurodegenerative stress.**

291 Cd<sup>2+</sup> targets the M1 metal ion binding site of mammalian PPM1 phosphatases and  
292 efficiently inhibits them (Pan et al., 2013). To test whether the Nil phosphatase is inhibited by  
293 Cd<sup>2+</sup> as well, we developed an in-situ assay. Eye-discs from Acn<sup>WT</sup> larvae were fixed and  
294 detergent-treated to preserve the phosphorylation status of Acinus which was detected by  
295 pS437-Acn staining (Figure 4K). In the fixed tissue, pS437-Acn was dephosphorylated by  
296 purified Nil phosphatase (Figure 4L), but not by Cd<sup>2+</sup>-inhibited Nil (Figure 4M) or inactive  
297 Nil<sup>D231N</sup> (Figure 4N), consistent with sensitivity to Cd<sup>2+</sup> inhibition being conserved in the Nil  
298 phosphatase.

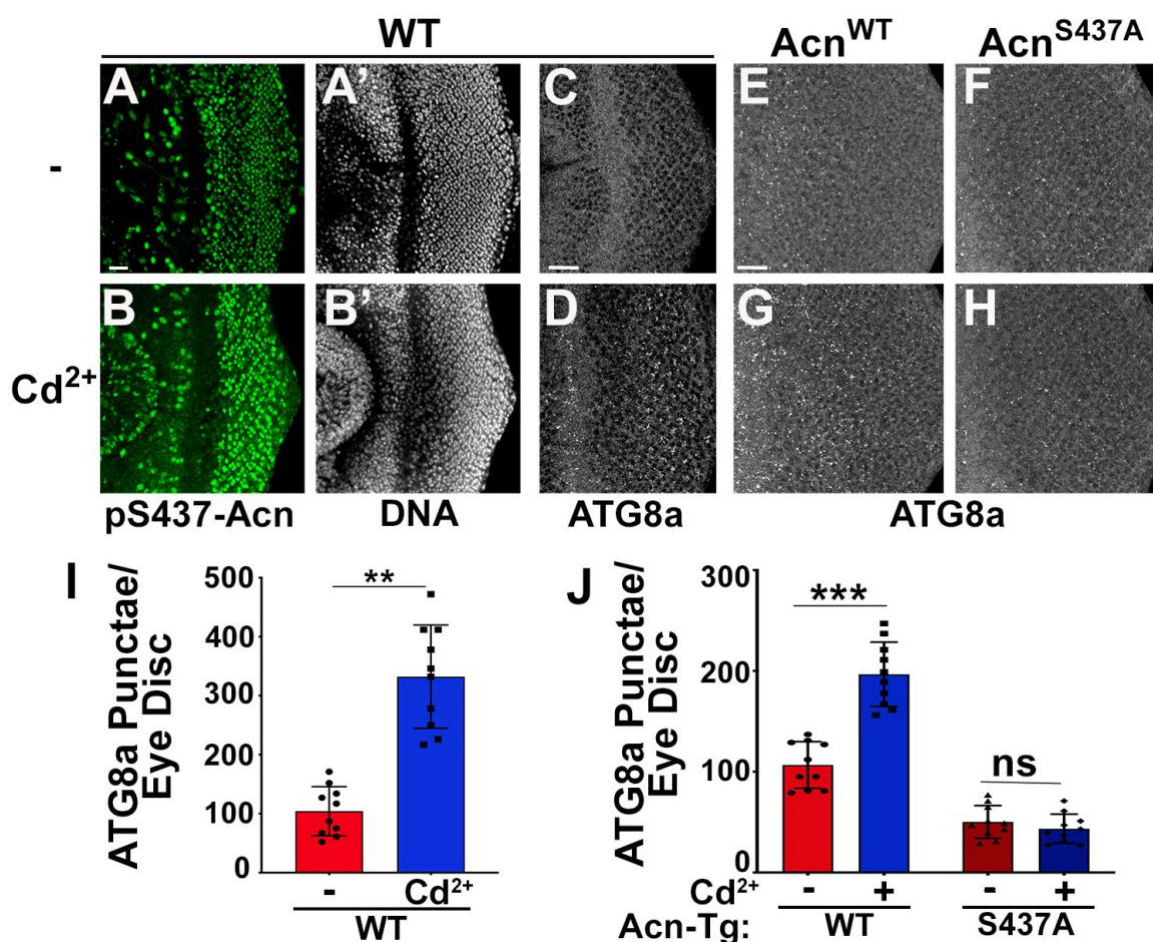

299

300 **Figure 5. Acinus-S437 phosphorylation is required for Cd<sup>2+</sup>-induced autophagy.**

301 (A-B) Projection of confocal micrographs of *w<sup>1118</sup>* larval eye discs stained for pS437-Acn (green) and  
302 DNA from either 100 μM CdCl<sub>2</sub> treated (B) or untreated (A) larvae.

303 (C-D) Projection of confocal micrographs of fed *w<sup>1118</sup>* larval eye discs either 100 μM CdCl<sub>2</sub> treated (D)  
304 or untreated (C) stained for Atg8a.

305 (E-H) Projection of confocal micrographs of fed *Acn<sup>WT</sup>* and *Acn<sup>S437A</sup>* larval eye discs either 100 μM  
306 CdCl<sub>2</sub> treated (G, H) or untreated (E, F) stained for Atg8a.

307 (I) Quantification of Atg8a punctae in either 100 μM CdCl<sub>2</sub> treated or untreated *w<sup>1118</sup>* larval eye discs.  
308 Data are from 10 larvae from three experimental repeats. Bar graphs show mean ±SD. \*\*p<0.01

309 (J) Quantification of Atg8a punctae in either 100 μM CdCl<sub>2</sub> treated or untreated *Acn<sup>WT</sup>* and *Acn<sup>S437A</sup>*  
310 larval eye discs. Data are from 10 larvae from three experimental repeats. Bar graphs show  
311 mean ±SD. ns, not significant; \*\*\*p<0.001.

312 Scale bar in A is 20 μm for A-H. Genotypes are listed in Supplemental Table 3.

313

314 Cd<sup>2+</sup>-induced cytotoxicity is associated with oxidative stress (Branca et al., 2020), which  
315 can be reduced by elevated levels of basal autophagy (Galati et al., 2019; Yun et al., 2020).

316 To test a possible role of the Nil phosphatase in Cd<sup>2+</sup>-induced cellular stress responses, we  
317 examined whether pS437-Acn levels increase upon exposure to environmental Cd<sup>2+</sup>. We

318 found that eye discs from wild-type larvae grown in 100  $\mu\text{M}$   $\text{Cd}^{2+}$  displayed elevated  
319 phosphorylation of Acn at S437 with a concomitant increase in the number of ATG8a  
320 positive punctae (Figure 5A-D,I).

321  $\text{Cd}^{2+}$  may also effect other signaling pathways with the potential to alter autophagy. We  
322 therefore wanted to test whether elevated Acn-S437 phosphorylation is necessary for  $\text{Cd}^{2+}$ -  
323 induced autophagy. For this purpose, we analyzed the effect of  $\text{Cd}^{2+}$  on basal autophagy in  
324 larvae expressing either Acn<sup>WT</sup> or Acn<sup>S437A</sup> under control of the Acn promoter in an *acn* null  
325 background (Nandi et al., 2017). We observed an increase in ATG8a punctae in fed eye  
326 discs from Acn<sup>WT</sup> larvae grown in 100  $\mu\text{M}$   $\text{Cd}^{2+}$  similar to wild-type animals (Figure 5E,G,J).  
327 By contrast,  $\text{Cd}^{2+}$  exposure failed to elevate basal autophagy in the phospho-inert Acn<sup>S437A</sup>  
328 mutants (Figure 5F,H,J) indicating that Acn-S437 phosphorylation is necessary for an  
329 autophagic response to  $\text{Cd}^{2+}$  exposure. Taken together, these data suggest exposure to  
330  $\text{Cd}^{2+}$  can elevate pS437-Acn levels and enhance basal autophagy flux by deactivating Nil  
331 phosphatase.

332 These findings motivated us to further investigate a possible role of the Nil phosphatase  
333 in  $\text{Cd}^{2+}$ -induced cytotoxicity. We exposed wild-type and *nil*<sup>1</sup> flies to varying concentrations of  
334  $\text{Cd}^{2+}$  and compared their survival. Compared to wild type, median survival time for *nil*<sup>1</sup>  
335 mutants increased by 2.5 days on exposure to 250  $\mu\text{M}$   $\text{Cd}^{2+}$ , and 5 days at 375  $\mu\text{M}$   $\text{Cd}^{2+}$   
336 (Figure 6C,D). Interestingly, this difference in susceptibility to  $\text{Cd}^{2+}$  poisoning was confined to  
337 a narrow concentrations range: in the absence of  $\text{Cd}^{2+}$  (Figure 6A, Figure 6-figure  
338 supplement 1), or at higher concentrations (500  $\mu\text{M}$ , Figure 6E), wild type and *nil*<sup>1</sup> mutants  
339 were not different in their survival. These data suggest that the elevated autophagy in *nil*<sup>1</sup>  
340 mutants helps the animals to cope with low levels of  $\text{Cd}^{2+}$ -induced oxidative stress, but is  
341 overwhelmed at higher levels.

342 Cdk5-p35-mediated AcnS437 phosphorylation alleviates proteostatic stress in  
343 *Drosophila* models of neurodegenerative diseases (Nandi et al., 2017). Therefore, we  
344 wondered whether loss of Nil phosphatase function may reduce neurodegenerative stress.  
345 Eye-specific expression of Huntingtin-polyQ polypeptides (HTT.Q93) results in neuronal  
346 degeneration reflected by depigmentation of the adult eye (Figure 6F,I, Supplemental Table  
347 2) as previously shown (Xu et al., 2015). This depigmentation phenotype is suppressed by  
348 knockdown of the Nil phosphatase (Figure 6G,J, Supplemental Table 2) but only marginally  
349 altered by overexpression of PPM1B, the human homolog of Nil, (Figure 6H,K,  
350 Supplemental Table 2). To more directly assess the effect of Nil phosphatase on the  
351 accumulation of polyQ proteins, we stained wandering larval eye discs for polyQ proteins.  
352 GMR-driven expression of HTT.Q93 resulted in accumulation of polyQ in eye discs a few  
353 rows posterior to the furrow (Figure 6L,M,P). Knocking down Nil phosphatase expression

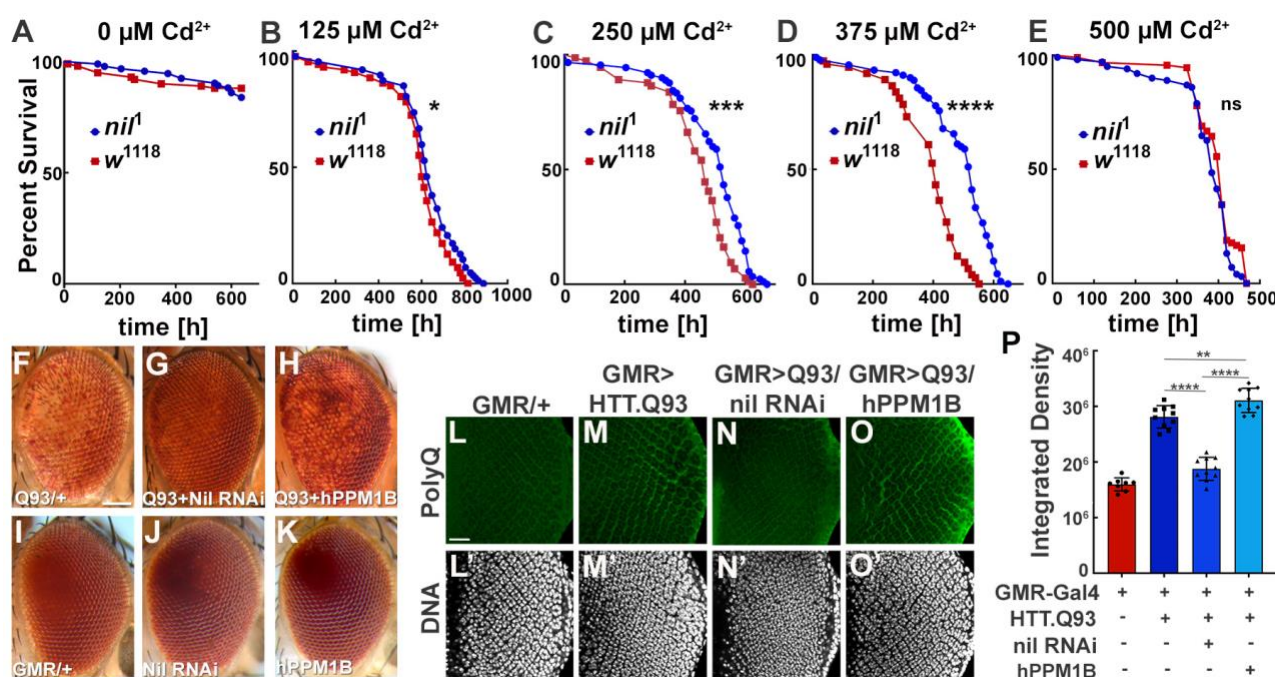

354 **Figure 6. Loss of Nil function provides partial protection against  $\text{Cd}^{2+}$  poisoning and**  
 355 **proteostasis stress.**

356 (A-E) Survival curves for  $w^{1118}$  and  $nil^1$  adult male flies either untreated (A) or treated with 125  $\mu\text{M}$   
 357  $\text{CdCl}_2$  (B), 250  $\mu\text{M}$   $\text{CdCl}_2$  (C), 375  $\mu\text{M}$   $\text{CdCl}_2$  (D), 500  $\mu\text{M}$   $\text{CdCl}_2$  (E). Log-rank comparisons  
 358 revealed significant differences between survival curves: ns, not significant; \* $p < 0.05$ ; \*\*\* $p < 0.001$ ;  
 359 \*\*\*\* $p < 0.0001$

360 (F-K) Micrographs of adult eyes in which GMR-Gal4 drives expression of UAS-HTT<sup>ex1</sup>.Q93 (F),  
 361 UAS-HTT<sup>ex1</sup>.Q93 + UAS-Nil RNAi (G), UAS-HTT<sup>ex1</sup>.Q93 + UAS-hPPM1B (H), UAS-Nil RNAi (J),  
 362 UAS-hPPM1B (K), and (I) represents GMR-Gal4 control. Scale bar in F is 100  $\mu\text{m}$  for F-K.

363 (L-O) Projection of confocal micrographs of larval eye discs stained for PolyQ (green) and DNA from  
 364 GMR-Gal4 (L, L'), GMR-Gal4, UAS-HTT<sup>ex1</sup>.Q93 (M, M'), GMR-Gal4, UAS-HTT<sup>ex1</sup>.Q93 + UAS-Nil  
 365 RNAi (N, N'), GMR-Gal4, UAS-HTT<sup>ex1</sup>.Q93 + UAS-hPPM1B (O, O').

366 (P) Quantification of PolyQ accumulation in eye discs of the indicated genotypes from a constant  
 367 area starting 2–3 rows posterior to the furrow containing around 100 ommatidial clusters. Bar  
 368 graphs show mean  $\pm$  SD of integrated densities from 10 larvae taken out of three experimental  
 369 repeats. \*\* $p < 0.01$ ; \*\*\*\* $p < 0.0001$ .

370 Scale bar in L is 20  $\mu\text{m}$  for L-O. Genotypes are listed in Supplemental Table 3.

371

372 significantly reduced polyQ accumulation posterior to the furrow (Figure 6N,P). By contrast,  
 373 overexpression of the human PPM1B phosphatase further enhanced the polyQ load (Figure  
 374 6I,P). This is consistent with the data above that show elevated autophagy in  $nil^1$  eye discs in  
 375 combination with the known role of autophagy in the clearance of protein aggregates  
 376 (Menziez et al., 2017). Taken together, these data suggest that PPM1-type phosphatases  
 377 play an important role in regulating cellular responses to  $\text{Cd}^{2+}$  toxicity and neurodegenerative  
 378 stress.

## 379 Discussion

380 We previously identified Acn as a signaling hub that integrates multiple stress response  
381 pathways to regulate autophagy (Nandi and Krämer, 2018). Starvation-independent  
382 autophagy is elevated in response to Acn being stabilized either by inhibition of its Caspase-  
383 3 mediated cleavage (Nandi et al., 2014) or by Cdk5-p35-mediated phosphorylation (Nandi  
384 et al., 2017). Here, we extend this concept to Nil-regulated dephosphorylation of Acn. We  
385 show that among the serine/threonine phosphatases encoded in the *Drosophila* genome the  
386 PPM-type phosphatase Nil is specifically responsible for counteracting Acn phosphorylation  
387 by the Cdk5-p35 complex, a function conserved in the human PPM1B homolog of Nil. We  
388 used three different methods to interfere with Nil function: RNAi-induced knockdown, the  
389 CRISPR/Cas9-generated *nil<sup>1</sup>* null allele, or Cd<sup>2+</sup>-mediated inhibition of Nil. All three yielded  
390 increased pS437-Acn levels and elevated autophagic flux. The increased autophagy, in  
391 agreement with its well-established beneficial functions in other contexts (Levine and  
392 Kroemer, 2019), extended survival time for flies exposed to Cd<sup>2+</sup>-laced food and reduced  
393 polyQ load in a *Drosophila* model of Huntington's disease. Thus, regulation of PPM-type  
394 phosphatase function may play an underappreciated role in the regulation of quality-control  
395 autophagy.

396 The family of PPM-type phosphatases is represented in the genomes of eukaryotes  
397 from yeast to humans and individual family members are highly conserved across phyla  
398 (Kamada et al., 2020). Despite roles of these phosphatases in diverse physiological  
399 contexts, including the regulation of metabolism, cell cycle progression, immunological  
400 responses and other stress responses, the in-vivo exploration of their functions in animal  
401 models lags behind that of their kinase counterparts. For example, the *Drosophila*  
402 *melanogaster* genome encodes 15 isoforms of PPM-type phosphatases (Kamada et al.,  
403 2020), but to our knowledge only two of them have previously been characterized in detail  
404 using null alleles. Interestingly, these studies revealed specific regulatory roles for both  
405 phosphatases: (i) Pdp (encoded by the *pyruvate dehydrogenase phosphatase* gene)  
406 dephosphorylates the Mad signal transducer and thereby negatively regulates BMP/Dpp  
407 signaling (Chen et al., 2006), (ii) the Alphabet phosphatase, similar to its human PPM1A/B  
408 homologs, regulates responses to developmental, oxidative or genotoxic stresses through  
409 dephosphorylation of different MAP Kinases (Baril et al., 2009; Baril and Therrien, 2006).  
410 Alphabet, among *Drosophila* phosphatases, is the one most similar to Nil (Kamada et al.,  
411 2020). Therefore, we tested whether Nil also affects phosphorylation of stress-activated  
412 MAP kinases and thereby indirectly alters Acn phosphorylation. We could not find evidence  
413 supporting this possibility. In *nil<sup>1</sup>* mutants, pS437-Acn phosphorylation still depended on  
414 Cdk5-p35 activity and levels of phosphorylated forms of ERK, Jun or p38 kinases appeared  
415 unchanged. Together, these findings argue against a contribution of stress-activated

416 kinases, other than Cdk5-p35, in Nil's effect on regulating phospho-Acn levels and  
417 autophagy.

418 Interestingly, other PPM-type phosphatases have also been implicated in the regulation  
419 of autophagy. In yeast, the Ptc2 and Ptc3 phosphatases redundantly regulate autophagy  
420 through the dephosphorylation of Atg1 and its binding partner Atg13 (Memisoglu et al.,  
421 2019). In mammalian cells, genotoxic stress activates PPM1D to dephosphorylate ULK1 and  
422 activate autophagy (Torii et al., 2016). In both cases, phosphatase activity counteracts the  
423 mTOR-mediated inhibition of autophagy. We do not know whether the Nil phosphatase  
424 affects other autophagy-related proteins in addition to Acn but, at least in the context of  
425 cadmium-induced autophagy, a critical step is the inhibition of Acn-S437 dephosphorylation  
426 by Nil, as cadmium can no longer induce autophagy in the phospho-inert *acn*<sup>S437A</sup>  
427 background.

428 Cadmium is an environmental pollutant which, unlike many other metal ions, has no  
429 known biological role. Toxic effects of elevated cadmium levels can manifest as kidney or  
430 skeletal diseases and have been linked to multiple cancers (Templeton and Liu, 2010; WHO,  
431 2020) and neurodegenerative disorders (Branca et al., 2020). The effects of cadmium on  
432 autophagy appear to be complex. Our data, in agreement with previous studies (So et al.,  
433 2018; Zhang et al., 2016), show elevated cadmium to induce autophagy with resulting  
434 cytoprotective effects, and we identify the inhibition of Nil-mediated Acn dephosphorylation  
435 as a key mechanism for this induction. In other contexts, especially cancer cells, cadmium  
436 appears to inhibit autophagy (Liang et al., 2021), suggesting that Cadmium interacts with a  
437 distinct signaling network in those cells. Interestingly, regulation of autophagy by Acn is  
438 independent of mTor signaling. The *Acn*<sup>S437A</sup> mutation interferes with autophagy induction by  
439 Cadmium or proteostasis stress, but does not block the mTor-dependent activation of  
440 autophagy upon amino-acid starvation (Nandi et al., 2017).

441 While there is now ample support for a role of Acn in regulating autophagy (Haberman  
442 et al., 2010; Nandi and Krämer, 2018; Nandi et al., 2017; Orvedahl et al., 2011), likely  
443 upstream of Atg1/ULK kinases (Tyra et al., 2020), the specific mechanism is not clear yet.  
444 Nil's localization to the nucleus is consistent with effects on the well-established role of  
445 *Drosophila* and mammalian Acn proteins in alternative splicing (Deka and Singh, 2019;  
446 Hayashi et al., 2014; Michelle et al., 2012; Murachelli et al., 2012; Nandi and Krämer, 2018;  
447 Rodor et al., 2016; Schwerk et al., 2003; Singh et al., 2010). Alternatively, the subset of Nil  
448 protein localizing close to endolysosomal compartments and autophagosomes points to an  
449 alternative possibility of a more direct role of phosphorylated Acn in regulating autophagic  
450 flux. Future work will be aimed at distinguishing between these possibilities.



451 **Author Contributions:**

452 NN conceived and executed experiments, analyzed data and drafted an early  
453 manuscript. ZZ executed experiments and analyzed data. CT executed experiments, HK  
454 conceived and executed experiments and analyzed data. All co-authors participated in  
455 revising the manuscript.

456 **Acknowledgements**

457 We thank members of the Krämer lab for helpful comments to the manuscript and  
458 technical assistance. We thank Drs. Edward Giniger, National Institute of Neurological  
459 Disorders and Stroke, Bethesda, Maryland, Robin Hiesinger, Free University Berlin, Berlin,  
460 Germany, the Vienna Drosophila Resource Center, and the Bloomington Drosophila Stock  
461 Center (NIH P40OD018537) for flies, and Akira Nakamura, RIKEN Center for Developmental  
462 Biology, Kobe, Japan, the Developmental Studies Hybridoma Bank at The University of Iowa  
463 for antibodies. This work was funded by NIH grants R01EY010199 and R21EY030785.

464 **Declaration of Interests:**

465 The authors declare no competing interests

466

## 467 **Methods**

468

### 469 **CONTACT FOR REAGENT AND RESOURCE SHARING**

470 Further requests for information or resources and reagents should be directed to and  
471 will be fulfilled by the Lead Contact, Helmut Kramer (helmut.kramer@utsouthwestern.edu)

### 472 **EXPERIMENTAL MODEL**

473 Fly stocks were maintained at room temperature under standard conditions.  
474 Bloomington *Drosophila* Stock Center provided Da-Gal4, GMR-Gal4 driver lines,  $w^{1118}$ ,  
475 serine-threonine phosphatase RNAi lines and UAS-hPPM1B (BS76916). Other fly strains  
476 used were  $p35^{20C}$ , which deletes ~90% of the *p35* coding region including all sequences  
477 required for binding to and activating Cdk5 (Connell-Crowley et al., 2007), a kind gift from  
478 Edward Giniger, National Institute of Neurological Disorders and Stroke, Bethesda,  
479 Maryland, YFP<sup>MYC</sup>-Rab5 (Dunst et al., 2015) and UAS-Htt-exon1-Q93 (Steffan et al., 2001),  
480 abbreviated UAS-Htt.Q93, was a gift from Robin Hiesinger, Free University Berlin, Berlin,  
481 Germany.

482 *nil*<sup>l</sup> null mutants and the endogenously tagged *nil* gene were generated essentially as  
483 described (Stenesen et al., 2015) using tools available from the O'Connor-Giles, Wildonger,  
484 and Harrison laboratories (Gratz et al., 2013). Specifically, gRNAs (see Supplemental Table  
485 4) were introduced into the pU6-BbsI vector and co-injected with the appropriate template  
486 plasmid for homologous repair. Embryo injections were done by Rainbow Transgenic Flies  
487 (Camarillo, CA), and the resulting potentially chimeric adult flies were crossed with  $w^{1118}$  flies.

488 For the *nil*<sup>l</sup> null allele, the template plasmid was assembled in the pHD-DsRed  
489 backbone using approximately 1kb PCR-amplified 5' and 3' homology arms. Their progeny,  
490 potential founders, were crossed to balancer stocks and resulting flies with eye-specific  
491 DsRed expression (Bier et al., 2018) were selected, balanced and homozygotes collected for  
492 further analysis.

493 For the *nil*<sup>Ty1-Gal4</sup> allele, the template plasmid was assembled in pBS-3xTy1-T2A-Gal4.  
494 Flanking homology 5' and 3' arms of approximately 1kb were synthesized as gBlocks with  
495 mutations in the gRNA target sites. Progeny from the initial cross with  $w^{1118}$  flies, potential  
496 founders, were crossed to flies containing a 20xUAS-6xmCherry-HA cassette, Bloomington  
497 stock: 52267, (Shearin et al., 2014). Males with elevated abdominal mCherry expression  
498 were identified and balanced. Both alleles, *nil*<sup>l</sup> and *nil*<sup>Ty1-Gal4</sup>, were confirmed by sequencing  
499 of PCR products generated with one primer outside the homology arms.

500 Transgenic flies were generated by BestGene, Inc. DNA constructs related to genomic  
501 *acn* were generated by standard mutagenesis of a 4-kb *Acn* DNA fragment sufficient for  
502 genomic rescue (Haberman et al., 2010), confirmed by sequencing, cloned into an *Attb*  
503 vector, and inserted into the 96F3 *AttP* landing site (Venken et al., 2006). UAS-  
504 *Acn* transgenes inserted into 43A1 landing site were previously described (Nandi et al.,  
505 2017).

506 To maximize knockdown efficiency experiments with UAS-RNAi transgenes were  
507 performed at 28°C.

508 Life span were analyzed as described previously (Nandi et al., 2014). Briefly, to  
509 measure life spans, males that emerged within a 2-day period were pooled and aged further  
510 for an additional 3 days, and then placed in demographic cages and their survival at 25°C  
511 was recorded every day. Around 100 flies were kept in each demographic cage with three  
512 replicates for each genotype. Food vials were changed every other day, and dead flies were  
513 counted and removed.

514 For Cd<sup>2+</sup> exposure of *Drosophila* larvae, fly eggs were allowed to develop on an apple  
515 juice agar plate containing the desired concentration of CdCl<sub>2</sub> at 25°C. For analyzing Cd<sup>2+</sup>  
516 toxicity, adult flies are kept in standard fly food with the desired concentrations of CdCl<sub>2</sub> at  
517 25°C. Males that emerged within a 2-day period were collected and aged for 3 more days,  
518 before being placed in demographic cages to record their survival every day. Around 50 flies  
519 are kept in each demographic cage with three replicates for each set. Food vials with the  
520 desired concentrations of CdCl<sub>2</sub> were changed every other day, and dead flies were counted  
521 and removed.

## 522 **Histology**

523 Eye micrographs were obtained at 72X magnification on a SteREO-microscope  
524 (SteREO Discovery.V12; Carl Zeiss) with a camera (AxioCam MRc 5; Carl Zeiss) using  
525 AxioVision image acquisition software (Carl Zeiss). Images of fly eyes are a composite of  
526 pictures taken at multiple z positions and compressed using CZFocus (Carl Zeiss) or Helicon  
527 Focus (Helicon Soft) software.

## 528 **Biochemistry**

529 Quantitative RT-PCR was used to measure knockdown efficiencies as previously  
530 described (Akbar et al., 2011). In short, RNA was isolated using TRIZOL (Ambion) according  
531 to the manufacturer's protocol. High-Capacity cDNA Reverse Transcription kit (Applied  
532 Biosystems) was then used to reverse transcribe 2 µg RNA with random hexamer primers.  
533 Quantitative PCR was performed using the Fast SYBR Green Master Mix in a real-time PCR  
534 system (Fast 7500; Applied Biosystems). Each data point was repeated three times and

535 normalized for the data for ribosomal protein 49 (RP49). Primers are listed in Supplemental  
536 Table 4.

537 For immunoblot experiments, 25 adult fly heads were homogenized in 250  $\mu$ l lysis buffer  
538 (10% SDS, 6 M urea, and 50 mM Tris-HCl, pH 6.8) at 95°C, boiled for 2 min, and spun for  
539 10 min at 20,000xg. 10  $\mu$ l lysate from larvae were separated by SDS-PAGE, transferred to  
540 nitrocellulose membranes, blocked in 3% non-fat dried milk and probed with rabbit anti-  
541 ATG8a (1:1000), rabbit anti-hook (1:5000), mouse anti-actin (JLA20) (1:2000) and mouse  
542 anti-Ty1 clone BB2 (1:2000). Bound antibodies were detected and quantified using IR-dye  
543 labelled secondary antibodies (1:15,000) and the Odyssey scanner (LI-COR Biosciences).  
544 Pre-stained molecular weight markers (HX Stable) were obtained from UBP-Bio.

### 545 **Immunofluorescence**

546 Whole-mount tissues for immunofluorescence staining were set up as described  
547 previously (Nandi et al., 2017). Briefly, dissected tissues after fixation in periodate-lysine-  
548 paraformaldehyde were washed in 1X PBS, permeabilized with 0.3% saponin in 1X PBS  
549 (PBSS), blocked with 5% goat serum in PBSS, and stained with the specified primary  
550 antibodies: rabbit anti-pS437Acn (1:1000, Nandi et al., 2017), guinea pig anti-Acn (1:1000,  
551 Nandi et al., 2014), mouse anti-V5 (1:500, Invitrogen), mouse anti-Ty1 clone BB2 (1:500,  
552 Invitrogen), rabbit anti-Arl8 at 1:300, (Boda et al., 2019), rabbit anti-Rab7 (1:3000, Tanaka et  
553 al., 2008, a kind gift from Akira Nakamura, RIKEN Center for Developmental Biology, Kobe,  
554 Japan), rabbit anti-phospho-p44/42 MAPK (Erk1/2) (Thr202/Tyr204) (D13.14.4E) (1:200,  
555 CST), mouse anti-phospho-SAPK/JNK (Thr183/Tyr185) (G9) (1:200, CST), rabbit anti-  
556 phospho-p38 MAPK (Thr180/Tyr182) (D3F9) (1:500, CST), mouse-anti 1C2 (1:1,000;  
557 MAB1574; EMD Millipore), rabbit anti-GABARAP (1:200; Abcam, ab109364), which detects  
558 endogenous Atg8a (Kim et al., 2015). Next, the tissues stained with primary antibodies  
559 overnight were washed and stained with secondary antibodies conjugated to Alexa Fluor  
560 488, 568, or 647 (1:500; Molecular Probes) and mounted in Vectashield containing DAPI  
561 (Vector Laboratories). Fluorescence images were captured with 63X, NA 1.4 or 40X, NA1.3  
562 or 20X, NA0.8 Plan Apochromat lenses on an inverted confocal microscope (LSM 710; Carl  
563 Zeiss). Confocal Z-stacks were acquired at 1- $\mu$ m step size.

564 For analysing autophagy flux 72-hours old larvae were transferred to fresh medium  
565 containing 3 mg/ml chloroquine (Sigma) as described previously (Low et al., 2013).

566 Z-projections of three optical sections for fat body tissue and eight optical sections for  
567 eye discs and antennal discs, each 1  $\mu$ m apart were used to quantify Atg8a punctae using  
568 Imaris software (Bitplane). For fat bodies, the number of punctate quantified represent per  
569 fat body cell. Integrated densities for polyQ in identical areas posterior to the morphogenetic  
570 furrow of eye discs were quantified using Image J software.

571 Digital images for display were bring into Photoshop (Adobe) and tuned for gain,  
572 contrast, and gamma settings.

573 All immunofluorescence experiments were repeated at least three times with at least  
574 three samples each.

### 575 **In-situ dephosphorylation assay**

576 Puromycin-selectable plasmids for the expression of C-terminally Twinstreptag-Flag-  
577 tagged Nil<sup>WT</sup> and Nil<sup>D231N</sup> proteins under control of the metallothionine promoter were  
578 transfected in S2 cells. Selected pools of 6x10<sup>6</sup> cells were induced with 0.7 mM CuSO<sub>4</sub> for  
579 16 hours. Cells were lysed in RIPA buffer, Nil proteins bound to MagStrep beads and  
580 washed following the manufacturer's instructions (IBA GmbH, Göttingen, Germany). Nil  
581 proteins were eluted using 50 mM Biotin in elution buffer (50 mM Tris pH8.5, 40 mM NaCl,  
582 0.1 mM EGTA, 1 mM DTT).

583 The in situ dephosphorylation assay was slightly modified from the method described  
584 (Nandi et al., 2017). Briefly, dissected third instar larval carcasses were fixed) in periodate-  
585 lysine-paraformaldehyde, permeabilized using PBSS and treated with either Nil<sup>WT</sup> or Nil<sup>WT</sup> +  
586 100 μM CdCl<sub>2</sub> or the inactive phosphatase Nil<sup>D231N</sup> in 1X phosphatase assay buffer (40 mM  
587 MgCl<sub>2</sub>, 40 mM MnCl<sub>2</sub>, 50 mM Tris pH 8.5, 40 mM NaCl, 0.1 mM EGTA, 1X EDTA free  
588 Protease inhibitor (Roche) and 1 mM PMSF) for 3 h at 37°C. Following the phosphatase  
589 reaction, eye discs were washed 3x in PBSS and stained for pS437-Acn, mounted and  
590 imaged as described above.

### 591 **Statistical methods**

592 Statistical significance was determined in Prism using one-way analysis of variance for  
593 multiple comparisons, followed by Tukey's test and log-rank for survival assays. We used  
594 two-way analysis of variance for multiple comparisons, followed by Bonferroni's test for  
595 individual comparisons to separate effects of treatment and genetic background. Bar graphs  
596 generated from this analysis demonstrate means ±SD. For quantifications of fluorescence  
597 images at least three independent experiments were used. P values smaller than 0.05 are  
598 considered significant, and values are indicated with one (<0.05), two (<0.01), three  
599 (<0.001), or four (<0.0001) asterisks.

600

601 **Supplemental Information**

602

603

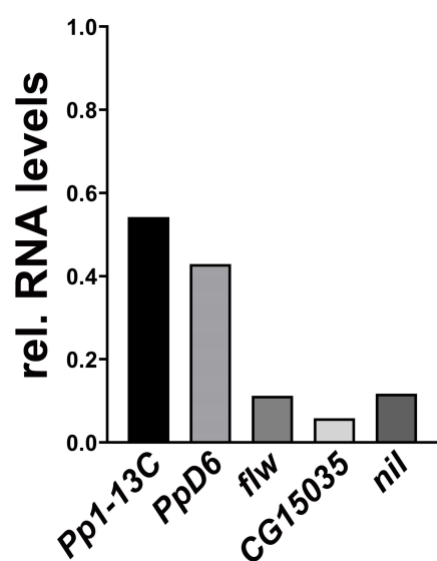

604

605 **Figure 1-figure supplement 1. qPCR analysis of phosphatase genes interacting with**  
606 **Acinus.**

607 *Da-Gal4 driven knockdown of indicated phosphatases in wandering third instar larvae*  
608 *and analysis of the fold decrease in transcript level by quantitative RT-PCR. The data is*  
609 *normalized to levels of RP49 transcription.*

610 *Genotypes are listed in Supplemental Table 3.*

611

612

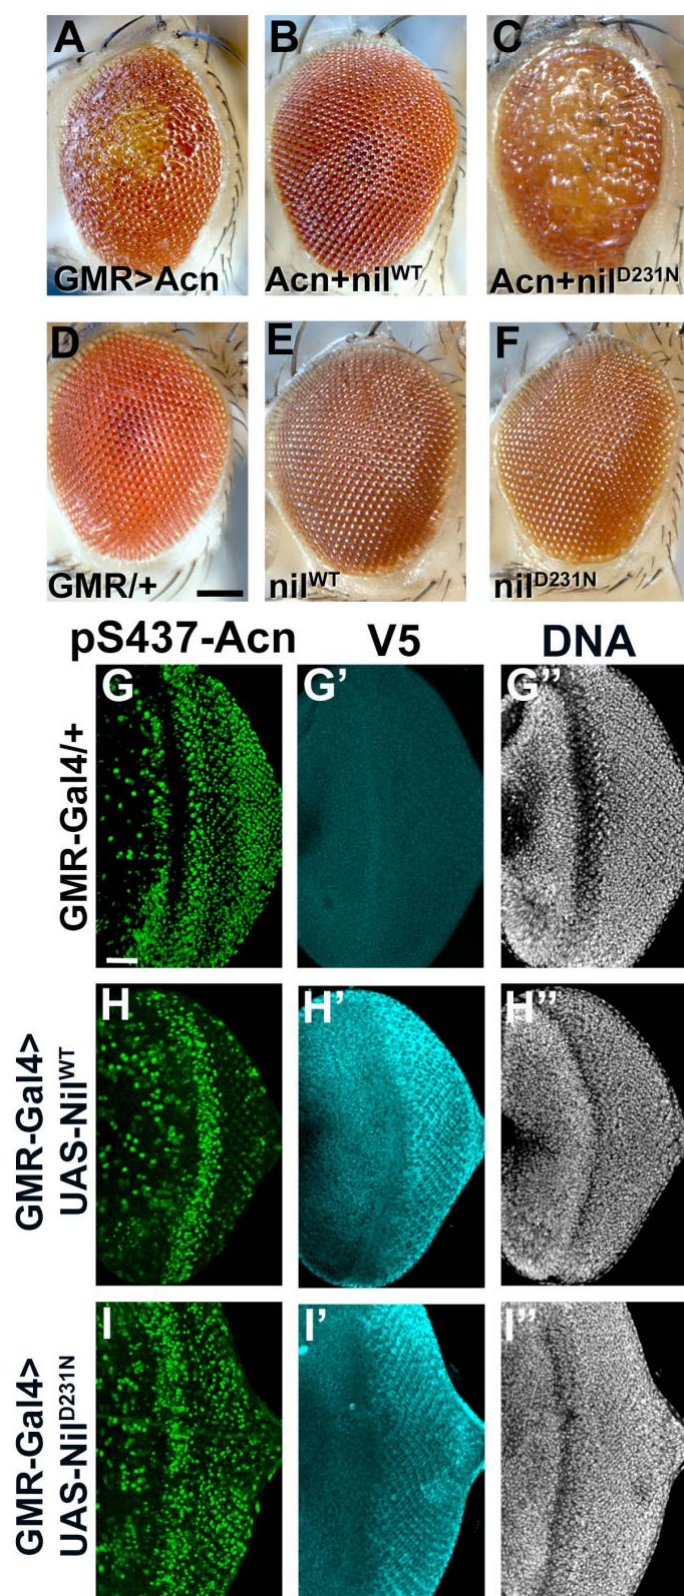

**Figure 2-figure supplement 1.**

**Effects of Nil overexpression depend on its phosphatase activity.**

(A–F) Micrographs of eyes in which *GMR-Gal4* drives expression of *Acn<sup>WT</sup>* (A), *Acn<sup>WT</sup>* + *Nil<sup>WT</sup>* (B), *Acn<sup>WT</sup>* + *Nil<sup>D231N</sup>* (C), *Nil<sup>WT</sup>* (E), *Nil<sup>D231N</sup>* (F) and *K* represents *GMR-Gal4* control. Scale bar in D is 100  $\mu$ m for A–F.

(G–I) Projection of confocal micrographs of larval eye discs stained for pS437-*Acn* (green), V5 (cyan) and DNA from *GMR-Gal4* (G–G’), *GMR-Gal4*, UAS- *Nil<sup>WT</sup>* (H–H’), *GMR-Gal4*, UAS- *Nil<sup>D231N</sup>* (I–I’). *Nil* transgenes are V5 tagged. Scale bar in G is 20  $\mu$ m for G–I.

Genotypes are listed in Supplemental Table 3.

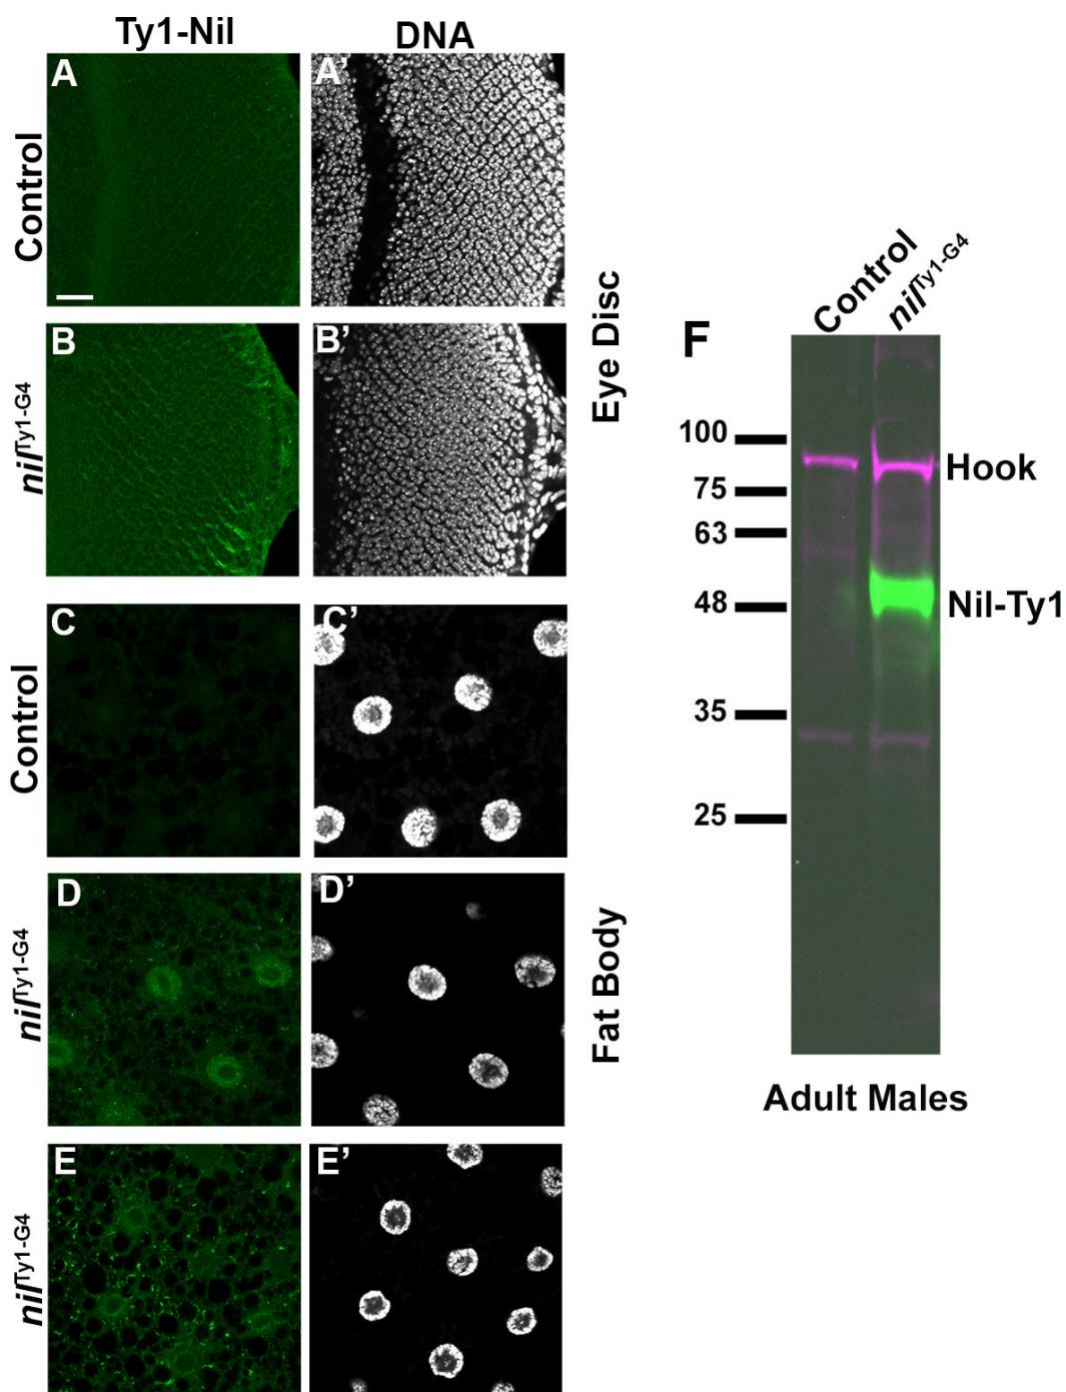

642 **Figure 2-figure supplement 2. Detection of Ty1-tagged endogenous Nil protein**  
643 (A-E) Projection of confocal micrographs of larval eye discs (B) and fat bodies (D, E) from  
644 *nil<sup>Ty1-G4</sup>* stained for Ty1 (green). No Ty1 (green) staining is observed in appropriate  
645 controls (A, C).  
646 (F) Western blot of lysates from *nil<sup>Ty1-G4</sup>* and appropriate control adult male flies probed for  
647 Ty1 and Hook as control.  
648 Scale bar in A is 20  $\mu$ m for A-E. Genotypes are listed in Supplemental Table 3.

649



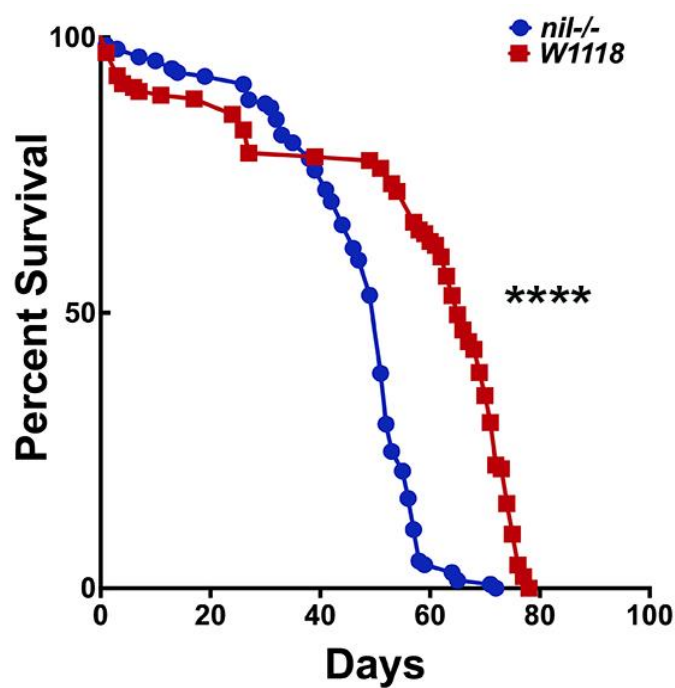

650

651 **Figure 6-figure supplement 1 . Survival curves for adult male  $w^{1118}$  and *nil*<sup>-/-</sup> flies.**

652 *Log-rank comparisons revealed significant difference between survival curves:*

653 \*\*\*\* $p < 0.0001$ . Genotypes are listed in Supplemental Table 3.

654

655

### Supplemental Table I. Genetic interactions of Acinus gain-of-function with different phosphatases

| GMR-Gal4 driven transgenes    | Normal    | Mild Errors | Rough Eyes | Severely Rough | Avg. Score | n = flies scored | Enhancement or Suppression |
|-------------------------------|-----------|-------------|------------|----------------|------------|------------------|----------------------------|
| Acinus (Acn)                  | 6         | 5           | 3          | 12             | 2.8        | 26               | N/A                        |
| GMR-Gal4                      | 56        | 10          | 0          | 0              | 1.2        | 66               | N/A                        |
| Acn + Alphabet (31398)        | 12        | 17          | 12         | 26             | 2.8        | 67               | 0%                         |
| Alphabet (31398)              | 31        | 21          | 0          | 0              | 1.4        | 52               |                            |
| Acn + Alphabet (40873)        | 1         | 6           | 30         | 53             | 3.2        | 90               | 33.24%                     |
| Alphabet (40873)              | 38        | 33          | 20         | 3              | 1.9        | 96               |                            |
| <b>Acn+ CG6036 (65115)</b>    | <b>3</b>  | <b>4</b>    | <b>3</b>   | <b>27</b>      | <b>3.5</b> | <b>37</b>        | <b>58.77%</b>              |
| CG6036 (65115)                | 42        | 5           | 0          | 0              | 1.1        | 47               |                            |
| Acn + CG6036 (105568)         | 3         | 23          | 5          | 24             | 2.9        | 55               | 5.56%                      |
| CG6036 (105568)               | 15        | 9           | 12         | 18             | 1.8        | 54               |                            |
| Acn + CG7115 (60015)          | 8         | 10          | 8          | 15             | 2.7        | 41               | -5.39%                     |
| CG7115 (60015)                | 47        | 20          | 0          | 0              | 1.3        | 67               |                            |
| Acn + CG7115 (103354)         | 5         | 22          | 2          | 17             | 3.0        | 46               | 11.11%                     |
| CG7115 (103354)               | 23        | 23          | 10         | 0              | 1.8        | 56               |                            |
| <b>Acn + CG10376 (41907)</b>  | <b>15</b> | <b>13</b>   | <b>12</b>  | <b>5</b>       | <b>2.2</b> | <b>45</b>        | <b>-58.56%</b>             |
| CG10376 (41907)               | 64        | 8           | 0          | 0              | 1.1        | 72               |                            |
| Acn + CG10376 (57036)         | 3         | 6           | 0          | 26             | 3.4        | 35               | 25%                        |
| CG10376 (57036)               | 16        | 7           | 12         | 0              | 2.4        | 31               |                            |
| Acn + CG10417 (39051)         | 16        | 27          | 3          | 29             | 2.3        | 75               | -41.96%                    |
| CG10417 (39051)               | 90        | 13          | 0          | 0              | 1.1        | 103              |                            |
| Acn + CG12091 (40936)         | 23        | 21          | 42         | 0              | 2.7        | 86               | 7.83%                      |
| CG12091 (40936)               | 74        | 13          | 0          | 0              | 1.2        | 87               |                            |
| Acn + CG12091 (105722)        | 5         | 8           | 0          | 20             | 3.1        | 33               | 17.34%                     |
| CG12091 (105722)              | 42        | 25          | 5          | 0              | 1.7        | 70               |                            |
| <b>Acn + CG15035 (60404)</b>  | <b>1</b>  | <b>5</b>    | <b>0</b>   | <b>28</b>      | <b>3.6</b> | <b>34</b>        | <b>74.95%</b>              |
| CG15035 (60404)               | 59        | 6           | 0          | 0              | 1.1        | 65               |                            |
| <b>Acn + CG17598 (38345)</b>  | <b>24</b> | <b>23</b>   | <b>0</b>   | <b>24</b>      | <b>2.3</b> | <b>71</b>        | <b>-44.76%</b>             |
| CG17598 (38345)               | 83        | 5           | 0          | 0              | 1.1        | 88               |                            |
| Acn + CG17746 (38347)         | 6         | 22          | 0          | 18             | 2.7        | 46               | -14.56%                    |
| CG17746 (38347)               | 74        | 3           | 0          | 0              | 1.03       | 77               |                            |
| <b>Acn + CG17746 (105177)</b> | <b>9</b>  | <b>16</b>   | <b>0</b>   | <b>7</b>       | <b>2.2</b> | <b>32</b>        | <b>-50%</b>                |
| CG17746 (105177)              | 70        | 3           | 3          | 0              | 1.2        | 73               |                            |
| Acn + Fig (65056)             | 6         | 8           | 3          | 12             | 2.7        | 39               | -7.55%                     |
| Fig (65056)                   | 59        | 4           | 0          | 0              | 1.1        | 63               |                            |
| Acn + Mppe (57773)            | 6         | 5           | 11         | 25             | 3.2        | 47               | 34.68%                     |
| Mppe (57773)                  | 44        | 1           | 0          | 0              | 1.0        | 45               |                            |
| Acn + Mppe (5773)             | 6         | 5           | 11         | 25             | 3.2        | 47               | 36.36%                     |
| Mppe (57773)                  | 44        | 1           | 0          | 0              | 1.1        | 45               |                            |

|                                 |    |    |    |    |     |    |         |
|---------------------------------|----|----|----|----|-----|----|---------|
| Acn + Phlpp (57349)             | 14 | 16 | 4  | 39 | 3.0 | 73 | 16.51%  |
| Phlpp (57349)                   | 58 | 6  | 0  | 0  | 1.1 | 64 |         |
| Acn + Phlpp (57399)             | 14 | 16 | 4  | 39 | 2.9 | 73 | 9.09%   |
| Phlpp (57399)                   | 58 | 6  | 0  | 0  | 1.1 | 64 |         |
| Acn + Pp2C1 (40827)             | 10 | 12 | 5  | 38 | 3.1 | 65 | 27.27%  |
| Pp2C1 (40827)                   | 41 | 7  | 0  | 0  | 1.1 | 48 |         |
| Acn + Ppm1 (41987)              | 5  | 1  | 2  | 30 | 3.5 | 38 | 33.33%  |
| Ppm1 (41987)                    | 17 | 18 | 20 | 0  | 2.1 | 55 |         |
| Acn + Pgam5 (33346)             | 6  | 12 | 5  | 53 | 3.4 | 76 | 30.53%  |
| Pgam5 (33346)                   | 22 | 17 | 21 | 0  | 1.9 | 60 |         |
| Acn + Pgam5-2 (57006)           | 6  | 4  | 18 | 12 | 2.8 | 40 | 0%      |
| Pgam5-2 (57006)                 | 44 | 15 | 9  | 0  | 1.5 | 68 |         |
| Acn + Ssu72 (57018)             | 0  | 16 | 2  | 11 | 2.8 | 29 | 0%      |
| Ssu72 (57018)                   | 25 | 5  | 0  | 0  | 1.2 | 30 |         |
| Acn + CanA1 (25850)             | 19 | 6  | 0  | 45 | 3.0 | 70 | 20.39%  |
| CanA1 (25850)                   | 65 | 2  | 0  | 0  | 1.0 | 67 |         |
| Acn + CG11597 (61988)           | 13 | 10 | 0  | 8  | 2.5 | 31 | 25%     |
| CG11597 (61988)                 | 49 | 7  | 0  | 0  | 1.1 | 56 |         |
| Acn + CG11597 (57047)           | 18 | 3  | 0  | 24 | 2.9 | 45 | 8.18%   |
| CG11597 (57047)                 | 64 | 6  | 0  | 0  | 1.1 | 70 |         |
| Acn + CG11597 (43175)           | 18 | 0  | 0  | 41 | 3.1 | 59 | 18.30%  |
| CG11597 (43175)                 | 45 | 35 | 0  | 0  | 1.5 | 75 |         |
| Acn + Flw (38336)               | 24 | 12 | 0  | 45 | 2.8 | 81 | 0.91%   |
| Flw (38336)                     | 65 | 6  | 0  | 0  | 1.1 | 71 |         |
| Acn + Flw (57022)               | 5  | 1  | 0  | 24 | 3.6 | 34 | 68.91%  |
| Flw (57022)                     | 39 | 5  | 0  | 0  | 1.1 | 44 |         |
| Acn + Mts (27723)               | 0  | 0  | 2  | 64 | 4.0 | 66 | 98.33%  |
| Mts (27723)                     | 37 | 7  | 3  | 0  | 1.2 | 50 |         |
| Acn + Mts (60342)               | 11 | 13 | 2  | 9  | 2.3 | 35 | -33.42% |
| Mts (60342)                     | 15 | 25 | 0  | 0  | 1.6 | 40 |         |
| Acn + Mts (57034)               | 0  | 0  | 0  | 2  | 4.0 | 2  | 42.86%  |
| Mts (57034)                     | 0  | 0  | 0  | 1  | 4   | 1  |         |
| Acn + Pp1-13C (32465)           | 3  | 4  | 0  | 48 | 3.7 | 55 | 66.92%  |
| Pp1-13C (32465)                 | 30 | 15 | 0  | 0  | 1.3 | 45 |         |
| Acn + Pp1-13C (107770)          | 6  | 17 | 13 | 18 | 2.8 | 54 | 0%      |
| Pp1-13C (107770)                | 55 | 20 | 17 | 5  | 1.8 | 92 |         |
| Acn + Pp1-87B (32414)           | 67 | 0  | 0  | 0  | 4.0 | 67 | 33.33%  |
| Pp1-87B (32414)                 | 0  | 0  | 3  | 27 | 3.6 | 30 |         |
| Acn + Pp1 $\alpha$ -96A (40906) | 29 | 8  | 0  | 14 | 2.1 | 48 | -61.65% |
| Pp1 $\alpha$ -96A (40906)       | 27 | 6  | 0  | 0  | 1.1 | 33 |         |
| Acn + Pp1 $\alpha$ -96A (42641) | 14 | 10 | 22 | 0  | 2.4 | 46 | -22.22% |
| Pp1 $\alpha$ -96A (42641)       | 10 | 3  | 0  | 6  | 1.8 | 19 |         |
| Acn + Pp1-Y1 (58098)            | 13 | 13 | 9  | 6  | 2.2 | 41 | -54.95% |
| Pp1-Y1 (58098)                  | 64 | 8  | 0  | 0  | 1.1 | 72 |         |

|                        |    |    |    |    |     |    |          |
|------------------------|----|----|----|----|-----|----|----------|
| Acn + Pp1-Y1 (65924)   | 8  | 2  | 0  | 35 | 3.4 | 45 | 33.33%   |
| Pp1-Y1 (65924)         | 15 | 18 | 4  | 0  | 1.8 | 37 |          |
| Acn + Pp1-Y2 (57236)   | 18 | 10 | 0  | 23 | 2.6 | 51 | -19.69%  |
| Pp1-Y2 (57236)         | 47 | 18 | 0  | 0  | 1.3 | 65 |          |
| Acn + Pp2B-14D (25929) | 31 | 23 | 6  | 13 | 2.0 | 73 | -72.48%  |
| Pp2B-14D (25929)       | 48 | 5  | 0  | 0  | 1.1 | 53 |          |
| Acn + Pp4-19C (27726)  | 18 | 17 | 3  | 19 | 2.4 | 57 | -36.76%  |
| Pp4-19C (27726)        | 62 | 6  | 0  | 0  | 1.1 | 68 |          |
| Acn + Pp4-19C (57823)  | 0  | 3  | 19 | 54 | 3.3 | 76 | 32.86%   |
| Pp4-19C (57823)        | 15 | 10 | 27 | 0  | 2.1 | 52 |          |
| Acn + PpD3 (42794)     | 8  | 8  | 7  | 17 | 2.8 | 40 | 2.29%    |
| PpD3 (42794)           | 38 | 4  | 0  | 0  | 1.1 | 42 |          |
| Acn + PpD6 (62849)     | 3  | 3  | 1  | 26 | 3.5 | 33 | 48.27%   |
| PpD6 (62849)           | 28 | 25 | 0  | 0  | 1.5 | 53 |          |
| Acn + PpN58A (57402)   | 16 | 20 | 2  | 36 | 2.8 | 74 | -1.28%   |
| PpN58A (57402)         | 40 | 53 | 0  | 0  | 1.6 | 93 |          |
| Acn + PpV (36064)      | 3  | 3  | 2  | 25 | 3.5 | 33 | 48.90%   |
| PpV (36064)            | 32 | 18 | 2  | 0  | 1.4 | 52 |          |
| Acn + PpV (57765)      | 23 | 26 | 6  | 12 | 2.1 | 67 | -56.00%  |
| PpV (57765)            | 57 | 19 | 0  | 0  | 1.3 | 76 |          |
| Acn + PpY-55A (57519)  | 33 | 19 | 0  | 0  | 1.4 | 52 | -113.89% |
| PpY-55A (57519)        | 37 | 13 | 0  | 0  | 1.3 | 50 |          |
| Acn + RdgC (60076)     | 23 | 28 | 1  | 29 | 2.5 | 71 | -17.44%  |
| RdgC (60076)           | 14 | 36 | 0  | 0  | 1.7 | 50 |          |

656 All flies were raised at 28°C.

657 Scores to calculate Average Roughness: normal = 1; mild = 2; rough = 3; strongly rough = 4.

658 (1) Positive or negative numbers indicate suppression and enhancement, respectively.

659 (2) Green or red colors highlight UAS-transgenes with more than 45% suppression or enhancement.

660 (3) Numbers in parenthesis indicated stock numbers of the Bloomington Drosophila stock center

661

662

663

664 **Supplemental Table 2. Effect of loss and gain of phosphatase activity on eye**  
665 **pigmentation in a Drosophila Huntington's model.**

666

| Genotype         | Scores for Depigmented Fly Eye |    |    |    |
|------------------|--------------------------------|----|----|----|
|                  | 1                              | 2  | 3  | 4  |
| GMR>Q93          | 0                              | 8  | 56 | 39 |
| GMR>Q93+Nil RNAi | 5                              | 72 | 17 | 0  |
| GMR>Q93+hPPM1B   | 0                              | 17 | 45 | 31 |
| GMR/+            | 93                             | 0  | 0  | 0  |
| GMR>Nil RNAi     | 97                             | 0  | 0  | 0  |
| GMR>hPPM1B       | 72                             | 0  | 0  | 0  |

667

668

669 All flies were raised at 28°C.

670 Scores to calculate Depigmentation and Roughness

671

672 Score 1: No depigmentation and no roughness

673 Score 2: Mild depigmentation and no roughness

674 Score 3: Moderate depigmentation and roughness

675 Score 4: Extreme depigmentation and roughness

676

677 **Supplemental Table 3. Genotypes of Flies Used for Each Figure**

| <b>Figure 1</b> | <b>Genotype</b>                                                                      |
|-----------------|--------------------------------------------------------------------------------------|
| 1 A             | $w^*$ ; GMR-Gal4, P[w+, UAS-Acn <sup>WT</sup> ] / CyO; + / +                         |
| 1 B             | $w^*$ ; GMR-Gal4, P[w+, UAS-Acn <sup>WT</sup> ] / +; UAS-Mts TRIP (BS 27723) / +     |
| 1 C             | $w^*$ ; GMR-Gal4, P[w+, UAS-Acn <sup>WT</sup> ] / +; UAS-Pp1-13C TRIP (BS 32465) / + |
| 1 D             | $w^*$ ; GMR-Gal4, P[w+, UAS-Acn <sup>WT</sup> ] / UAS-PpD6 TRIP (BS 62849); + / +    |
| 1 E             | $w^*$ ; GMR-Gal4, P[w+, UAS-Acn <sup>WT</sup> ] / +; UAS-Flw TRIP (BS 38336) / +     |
| 1 F             | $w^*$ ; GMR-Gal4, P[w+, UAS-Acn <sup>WT</sup> ] / UAS-CG15035 TRIP (BS 60404); + / + |
| 1 G             | $w^*$ ; GMR-Gal4, P[w+, UAS-Acn <sup>WT</sup> ] / UAS-Nil TRIP (BS 65115); + / +     |
| 1 H             | $w^*$ ; GMR-Gal4 / +; + / +                                                          |
| 1 I             | $w^*$ ; GMR-Gal4 / +; UAS-Mts TRIP (BS 27723) / +                                    |
| 1 J             | $w^*$ ; GMR-Gal4 / +; UAS-Pp1-13C TRIP (BS 32465) / +                                |
| 1 K             | $w^*$ ; GMR-Gal4 / UAS-PpD6 TRIP (BS 62849); + / +                                   |
| 1 L             | $w^*$ ; GMR-Gal4 / +; UAS-Flw TRIP (BS 38336) / +                                    |
| 1 M             | $w^*$ ; GMR-Gal4 / UAS-CG15035 TRIP (BS 60404); + / +                                |
| 1 N             | $w^*$ ; GMR-Gal4 / UAS-Nil TRIP (BS 65115); + / +                                    |
| 1 O             | $w^*$ ; CyO / +; Da-Gal4 / +                                                         |
| 1 P             | $w^*$ ; CyO / +; Da-Gal4 / UAS-Pp1-13C TRIP (BS 32465)                               |
| 1 Q             | $w^*$ ; CyO / UAS-PpD6 TRIP (BS 62849); Da-Gal4 / +                                  |
| 1 R             | $w^*$ ; CyO / +; Da-Gal4 / UAS-Flw TRIP (BS 38336)                                   |
| 1 S             | $w^*$ ; CyO / UAS-CG15035 TRIP (BS 60404); Da-Gal4 / +                               |
| 1 T             | $w^*$ ; CyO / UAS-Nil TRIP (BS 65115); Da-Gal4 / +                                   |
|                 |                                                                                      |
| <b>Figure 2</b> | <b>Genotype</b>                                                                      |
| 2 B             | $w^{1118}$                                                                           |
| 2 C             | $nil^l$                                                                              |
| 2 D             | $w^{1118}$                                                                           |
| 2 E             | $nil^l$                                                                              |
| 2 F             | $w^*$ ; GMR-Gal4 / +; + / +                                                          |
| 2 G             | $nil^l$                                                                              |
| 2 H             | $w^*$ ; GMR-Gal4 / UAS-Nil <sup>WT</sup> -V5; $nil^l$                                |
| 2 I             | $w^*$ ; GMR-Gal4 / UAS-hPPM1B-HA (BS 76916); $nil^l$                                 |
| 2 J             | $w^*$ ; GMR-Gal4 / UAS-V5-Nil <sup>D231N</sup> ; $nil^l$                             |
| 2 K             | $w^*$ ; +/+; $nil^{Ty1-Gal4}$                                                        |
| 2 L             | $w^*$ ; YFP <sup>MYC</sup> -Rab5/+; $nil^{Ty1-Gal4}$ / +                             |
| 2 M             | $w^*$ ; +/+; $nil^{Ty1-Gal4}$                                                        |
| 2 N             | $w^*$ ; +/+; $nil^{Ty1-Gal4}$                                                        |
| 2 O             | $w^*$ ; +/+; $nil^{Ty1-Gal4}$                                                        |
|                 |                                                                                      |
| <b>Figure 3</b> | <b>Genotype</b>                                                                      |
| 3 A, B          | $w^{1118}$<br>$nil^l$                                                                |
| 3 C             | $w^{1118}$                                                                           |
| 3 D             | $nil^l$                                                                              |
| 3 E             | $w^{1118}$<br>$nil^l$                                                                |
| 3 F             | $w^{1118}$                                                                           |
| 3 G             | $nil^l$                                                                              |
| 3 H             | $w^{1118}$<br>$nil^l$                                                                |
| 3 I             | $w^{1118}$                                                                           |
| 3 J             | $nil^l$                                                                              |
| 3 K             | $w^{1118}$                                                                           |
| 3 L             | $nil^l$                                                                              |
| 3 M             | $w^{1118}$                                                                           |
| 3 N             | $nil^l$                                                                              |

|                          |                                                                                                                                                                                                                                                                                                                   |
|--------------------------|-------------------------------------------------------------------------------------------------------------------------------------------------------------------------------------------------------------------------------------------------------------------------------------------------------------------|
| 3 O                      | <i>w</i> <sup>1118</sup>                                                                                                                                                                                                                                                                                          |
| 3 P                      | <i>nil</i> <sup>l</sup>                                                                                                                                                                                                                                                                                           |
| 3 Q                      | <i>w</i> <sup>1118</sup><br><i>nil</i> <sup>l</sup>                                                                                                                                                                                                                                                               |
| 3 R                      | <i>w</i> <sup>1118</sup><br><i>nil</i> <sup>l</sup>                                                                                                                                                                                                                                                               |
| <b>Figure 4 Genotype</b> |                                                                                                                                                                                                                                                                                                                   |
| 4 A                      | <i>w</i> <sup>1118</sup>                                                                                                                                                                                                                                                                                          |
| 4 B                      | <i>nil</i> <sup>l</sup>                                                                                                                                                                                                                                                                                           |
| 4 C                      | <i>w</i> <sup>1118</sup>                                                                                                                                                                                                                                                                                          |
| 4 D                      | <i>nil</i> <sup>l</sup>                                                                                                                                                                                                                                                                                           |
| 4 E                      | <i>w</i> <sup>1118</sup>                                                                                                                                                                                                                                                                                          |
| 4 F                      | <i>nil</i> <sup>l</sup>                                                                                                                                                                                                                                                                                           |
| 4 G                      | <i>w</i> <sup>1118</sup>                                                                                                                                                                                                                                                                                          |
| 4 H                      | <i>p35</i> <sup>20C</sup>                                                                                                                                                                                                                                                                                         |
| 4 I                      | <i>nil</i> <sup>l</sup>                                                                                                                                                                                                                                                                                           |
| 4 J                      | <i>p35</i> <sup>20C</sup> ; <i>nil</i> <sup>l</sup>                                                                                                                                                                                                                                                               |
| 4 K-N                    | <i>w</i> <sup>*</sup> ; <i>acn</i> <sup>1</sup> /ubi-GFP <i>acn</i> <sup>27</sup> ubi-GFP; P[w+, <i>acn</i> P-Myc-Acn <sup>WT</sup> ] <sup>96F3</sup>                                                                                                                                                             |
| <b>Figure 5 Genotype</b> |                                                                                                                                                                                                                                                                                                                   |
| 5 A                      | <i>w</i> <sup>1118</sup>                                                                                                                                                                                                                                                                                          |
| 5 B                      | <i>w</i> <sup>1118</sup>                                                                                                                                                                                                                                                                                          |
| 5 C                      | <i>w</i> <sup>1118</sup>                                                                                                                                                                                                                                                                                          |
| 5 D                      | <i>w</i> <sup>1118</sup>                                                                                                                                                                                                                                                                                          |
| 5 E                      | <i>w</i> <sup>*</sup> ; <i>acn</i> <sup>1</sup> /ubi-GFP <i>acn</i> <sup>27</sup> ubi-GFP; P[w+, <i>acn</i> P-Myc-Acn <sup>WT</sup> ] <sup>96F3</sup>                                                                                                                                                             |
| 5 F                      | <i>w</i> <sup>*</sup> ; <i>acn</i> <sup>1</sup> /ubi-GFP <i>acn</i> <sup>27</sup> ubi-GFP; P[w+, <i>acn</i> P-Myc-Acn <sup>S437A</sup> ] <sup>96F3</sup>                                                                                                                                                          |
| 5 G                      | <i>w</i> <sup>*</sup> ; <i>acn</i> <sup>1</sup> /ubi-GFP <i>acn</i> <sup>27</sup> ubi-GFP; P[w+, <i>acn</i> P-Myc-Acn <sup>WT</sup> ] <sup>96F3</sup>                                                                                                                                                             |
| 5 H                      | <i>w</i> <sup>*</sup> ; <i>acn</i> <sup>1</sup> /ubi-GFP <i>acn</i> <sup>27</sup> ubi-GFP; P[w+, <i>acn</i> P-Myc-Acn <sup>S437A</sup> ] <sup>96F3</sup>                                                                                                                                                          |
| 5 I                      | <i>w</i> <sup>1118</sup>                                                                                                                                                                                                                                                                                          |
| 5 J                      | <i>w</i> <sup>*</sup> ; <i>acn</i> <sup>1</sup> /ubi-GFP <i>acn</i> <sup>27</sup> ubi-GFP; P[w+, <i>acn</i> P-Myc-Acn <sup>WT</sup> ] <sup>96F3</sup><br><i>w</i> <sup>*</sup> ; <i>acn</i> <sup>1</sup> /ubi-GFP <i>acn</i> <sup>27</sup> ubi-GFP; P[w+, <i>acn</i> P-Myc-Acn <sup>S437A</sup> ] <sup>96F3</sup> |
| <b>Figure 6 Genotype</b> |                                                                                                                                                                                                                                                                                                                   |
| 6 A-E                    | <i>w</i> <sup>1118</sup><br><i>nil</i> <sup>l</sup>                                                                                                                                                                                                                                                               |
| 6 F                      | <i>w</i> <sup>*</sup> ; GMR-Gal4 / +; UAS-Htt-exon1-Q93 / +                                                                                                                                                                                                                                                       |
| 6 G                      | <i>w</i> <sup>*</sup> ; GMR-Gal4 / UAS-Nil TRIP (BS 65115); UAS-Htt-exon1-Q93 / +                                                                                                                                                                                                                                 |
| 6 H                      | <i>w</i> <sup>*</sup> ; GMR-Gal4 / UAS-hPPM1B-HA (BS 76916); UAS-Htt-exon1-Q93 / +                                                                                                                                                                                                                                |
| 6 I                      | <i>w</i> <sup>*</sup> ; GMR-Gal4 / +; + / +                                                                                                                                                                                                                                                                       |
| 6 J                      | <i>w</i> <sup>*</sup> ; GMR-Gal4 / UAS-Nil TRIP (BS 65115); + / +                                                                                                                                                                                                                                                 |
| 6 K                      | <i>w</i> <sup>*</sup> ; GMR-Gal4 / UAS-hPPM1B-HA (BS 76916); + / +                                                                                                                                                                                                                                                |
| 6 L                      | <i>w</i> <sup>*</sup> ; GMR-Gal4 / +; + / +                                                                                                                                                                                                                                                                       |
| 6 M                      | <i>w</i> <sup>*</sup> ; GMR-Gal4 / +; UAS-Htt-exon1-Q93 / +                                                                                                                                                                                                                                                       |
| 6 N                      | <i>w</i> <sup>*</sup> ; GMR-Gal4 / UAS-Nil TRIP (BS 65115); UAS-Htt-exon1-Q93 / +                                                                                                                                                                                                                                 |
| 6 O                      | <i>w</i> <sup>*</sup> ; GMR-Gal4 / UAS-hPPM1B-HA (BS 76916); UAS-Htt-exon1-Q93 / +                                                                                                                                                                                                                                |
| 6 P                      | <i>w</i> <sup>*</sup> ; GMR-Gal4 / +; + / +<br><i>w</i> <sup>*</sup> ; GMR-Gal4 / +; UAS-Htt-exon1-Q93 / +<br><i>w</i> <sup>*</sup> ; GMR-Gal4 / UAS-Nil TRIP (BS 65115); UAS-Htt-exon1-Q93 / +<br><i>w</i> <sup>*</sup> ; GMR-Gal4 / UAS-hPPM1B-HA (BS 76916); UAS-Htt-exon1-Q93 / +                             |

| <b>Figure S1</b> | <b>Genotype</b>                                                                                                                                                                                                                                                                                                     |
|------------------|---------------------------------------------------------------------------------------------------------------------------------------------------------------------------------------------------------------------------------------------------------------------------------------------------------------------|
|                  | $w^*$ ; CyO / +; Da-Gal4 / +<br>$w^*$ ; CyO / +; Da-Gal4 / UAS-Pp1-13C TRIP (BS 32465)<br>$w^*$ ; CyO / UAS-PpD6 TRIP (BS 62849); Da-Gal4 / +<br>$w^*$ ; CyO / +; Da-Gal4 / UAS-Flw TRIP (BS 38336)<br>$w^*$ ; CyO / UAS-CG15035 TRIP (BS 60404); Da-Gal4 / +<br>$w^*$ ; CyO / UAS-Nil TRIP (BS 65115); Da-Gal4 / + |
| <b>Figure S2</b> | <b>Genotype</b>                                                                                                                                                                                                                                                                                                     |
| S2A              | $w^*$ ; GMR-Gal4, P[w+, UAS-Acn <sup>WT</sup> ] / CyO; Sb / +                                                                                                                                                                                                                                                       |
| S2B              | $w^*$ ; GMR-Gal4, P[w+, UAS-Acn <sup>WT</sup> ] / UAS-V5-Nil <sup>WT</sup> ; Sb / +                                                                                                                                                                                                                                 |
| S2C              | $w^*$ ; GMR-Gal4, P[w+, UAS-Acn <sup>WT</sup> ] / UAS-V5-Nil <sup>D231N</sup> ; Sb / +                                                                                                                                                                                                                              |
| S2D              | $w^*$ ; GMR-Gal4 / CyO; Sb / +                                                                                                                                                                                                                                                                                      |
| S2E              | $w^*$ ; GMR-Gal4 / UAS-Nil <sup>WT</sup> -V5; Sb / +                                                                                                                                                                                                                                                                |
| S2F              | $w^*$ ; GMR-Gal4 / UAS-Nil <sup>D231N</sup> -V5; Sb / +                                                                                                                                                                                                                                                             |
| S2G              | $w^*$ ; GMR-Gal4 / CyO; Sb / +                                                                                                                                                                                                                                                                                      |
| S2H              | $w^*$ ; GMR-Gal4 / UAS- Nil <sup>WT</sup> -V5; Sb / +                                                                                                                                                                                                                                                               |
| S2I              | $w^*$ ; GMR-Gal4 / UAS- UAS-Nil <sup>D231N</sup> -V5; Sb / +                                                                                                                                                                                                                                                        |
| <b>Figure S3</b> | <b>Genotype</b>                                                                                                                                                                                                                                                                                                     |
| S3A              | $y^1w^*$ ; PBac{y[+mDint2] w[+mC]=20XUAS-6XmCherry-HA}VK00018 / +, P{Wee-P.ph0}Bacc[Wee-P20]; + / TM6C, Sb, Tb <sup>1</sup>                                                                                                                                                                                         |
| S3B              | $w^*$ ; +/+; nil <sup>Ty1-Gal4</sup>                                                                                                                                                                                                                                                                                |
| S3C              | $y^1w^*$ ; PBac{y[+mDint2] w[+mC]=20XUAS-6XmCherry-HA}VK00018 / +, P{Wee-P.ph0}Bacc[Wee-P20]; + / TM6C, Sb, Tb <sup>1</sup>                                                                                                                                                                                         |
| S3D              | $w^*$ ; +/+; nil <sup>Ty1-Gal4</sup>                                                                                                                                                                                                                                                                                |
| S3E              | $w^*$ ; +/+; nil <sup>Ty1-Gal4</sup>                                                                                                                                                                                                                                                                                |
| S3F              | $y^1w^*$ ; PBac{y[+mDint2] w[+mC]=20XUAS-6XmCherry-HA}VK00018 / +, P{Wee-P.ph0}Bacc[Wee-P20]; + / TM6C, Sb, Tb <sup>1</sup><br>$w^*$ ; +/+; nil <sup>Ty1-Gal4</sup>                                                                                                                                                 |
| <b>Figure S4</b> | <b>Genotype</b>                                                                                                                                                                                                                                                                                                     |
|                  | $w^{1118}$<br>nil <sup>l</sup>                                                                                                                                                                                                                                                                                      |

678  
679  
680



681 **Supplemental Table 4 - DNA oligonucleotides used**

|                                      |                                     |
|--------------------------------------|-------------------------------------|
| <b><i>nil</i><sup>1</sup> Mutant</b> |                                     |
| Nil gRNA1 sense                      | CTTCGGATGTGATGACTAGCAGCG            |
| Nil gRNA1 antisense                  | CCTACACTACTGATCGTCGC <sup>CAA</sup> |
| Nil gRNA2 sense                      | CTTCGGAAATGGAGGATAGCCACT            |
| Nil gRNA2 antisense                  | CCTTTACCTCCTATCGGTGA <sup>CAA</sup> |
|                                      |                                     |
| <b>PCR Confirmation</b>              |                                     |
| DsRed fwd                            | ACTCCAAGCTGGACATCACC                |
| Nil rev                              | TCCGCTCTGCAATTCTTTTT                |
| DsRed rev                            | GGGTGCTTACGTACACCTT                 |
| Nil fwd                              | CAACATTTACCTGCGGTGTG                |
|                                      |                                     |
| <b>Nil-Ty1 tagging</b>               |                                     |
| Nil gRNA3 sense                      | CTTCGTAGCAACAGCTGTGCATTA            |
| Nil gRNA3 antisense                  | CATCGTTGTCGACACGTAAT <sup>CAA</sup> |
| Nil gRNA4 sense                      | CTTCGAGTATCTGGAAATTTCTCG            |
| Nil gRNA4 antisense                  | CTCATAGACCTTTAAAGAGC <sup>CAA</sup> |
|                                      |                                     |
| <b>PCR Confirmation</b>              |                                     |
| G4 fwd                               | GCGTATAACGCGTTTGGAAAT               |
| Nil 3' rev                           | TTGGTTTGGTCTGCATTTGA                |
| G4 rev                               | TCGGTTTTTCTTTGGAGCAC                |
| Nil 5' fwd                           | CGCAACGTGGTCATATTTTG                |
|                                      |                                     |
| <b>qPCR Primers</b>                  |                                     |
| RP49_qPCR_Fwd                        | ATCGGTTACGGATCGAACAA                |
| RP49_qPCR_Rev                        | GACAATCTCCTTGCCTTCT                 |
| Pp1-13C_qPCR_Fwd                     | GGGACTACTCTGTGACCTGC                |
| Pp1-13C_qPCR_Rev                     | AACCATCCTCGACGACTTGA                |
| PpD6_qPCR_Fwd                        | CTGGTGCCCTGAATCTGAAC                |
| PpD6_qPCR_Rev                        | AAAACCTGCCCGTGTATGTCTG              |
| flw_qPCR_Fwd                         | CGGGTTACTGTGCGATCTTC                |
| flw_qPCR_Rev                         | TAGCCATCCTCCACAACCTG                |
| CG15035_qPCR_Fwd                     | GCACCCGATTTTAAGCCGAA                |
| CG15035_qPCR_Rev                     | CTTTACCAGATCGCACCACC                |
| CG6036_qPCR_Fwd                      | GACTAGCAGCGAGGTTTGTG                |
| CG6036_qPCR_Rev                      | TCAAGACTCCTTTTCGGCCTT               |

682

683

684 **Figure 2- figure supplement 2- source data 1**

685 **Raw western blot data with molecular weight markers for Figure 2-figure supplement 2F from**  
686 **lysates of adult male flies of *nil<sup>Ty1-G4</sup>* and appropriate control probed for Ty1 and Hook.**

687 Western blot analysis using anti-Ty1 and anti-Hook antibodies in lysates from adult males of *nil<sup>Ty1G4</sup>*  
688 and appropriate control. The parts of the raw image used in Figure 2-figure supplement 2F were  
689 marked with box.

690

691

692 **Figure 3—source data 1**

693 **Raw western blot data with molecular weight markers for Figure 3A from lysates of adult heads of**  
694 ***w<sup>1118</sup>* and *nil<sup>l</sup>* probed for ATG8a and Actin.**

695 Western blot analysis using anti-ATG8a and anti-actin antibodies in lysates from adult heads of *w<sup>1118</sup>*  
696 and *nil<sup>l</sup>*. Boxes mark the parts of the raw image used in Figure 3A.

697

## 698 **References**

- 699 Akbar, M.A., Tracy, C., Kahr, W.H., and Krämer, H. (2011). The full-of-bacteria gene is required for  
700 phagosome maturation during immune defense in *Drosophila*. *The Journal of cell biology* *192*,  
701 383-390.
- 702 Andreeva, A.V., and Kutuzov, M.A. (2001). PPP family of protein Ser/Thr phosphatases: two distinct  
703 branches? *Mol Biol Evol* *18*, 448-452.
- 704 Baril, C., Sahmi, M., Ashton-Beaucage, D., Stronach, B., and Therrien, M. (2009). The PP2C Alphabet  
705 is a negative regulator of stress-activated protein kinase signaling in *Drosophila*. *Genetics* *181*,  
706 567-579.
- 707 Baril, C., and Therrien, M. (2006). Alphabet, a Ser/Thr phosphatase of the protein phosphatase 2C  
708 family, negatively regulates RAS/MAPK signaling in *Drosophila*. *Dev Biol* *294*, 232-245.
- 709 Bier, E., Harrison, M.M., O'Connor-Giles, K.M., and Wildonger, J. (2018). Advances in Engineering the  
710 Fly Genome with the CRISPR-Cas System. *Genetics* *208*, 1-18.
- 711 Bilen, J., and Bonini, N.M. (2007). Genome-wide screen for modifiers of ataxin-3 neurodegeneration  
712 in *Drosophila*. *PLoS Genet* *3*, 1950-1964.
- 713 Boda, A., Lőrincz, P., Takáts, S., Csizmadia, T., Tóth, S., Kovács, A.L., and Juhász, G. (2019). *Drosophila*  
714 *Arl8* is a general positive regulator of lysosomal fusion events. *Biochim Biophys Acta Mol Cell Res*  
715 *1866*, 533-544.
- 716 Branca, J.J.V., Fiorillo, C., Carrino, D., Paternostro, F., Taddei, N., Gulisano, M., Pacini, A., and Becatti,  
717 M. (2020). Cadmium-Induced Oxidative Stress: Focus on the Central Nervous System.  
718 *Antioxidants (Basel)* *9*.
- 719 Brown, J.B., Boley, N., Eisman, R., May, G.E., Stoiber, M.H., Duff, M.O., Booth, B.W., Wen, J., Park, S.,  
720 Suzuki, A.M., *et al.* (2014). Diversity and dynamics of the *Drosophila* transcriptome. *Nature* *512*,  
721 393-399.
- 722 Chen, H.B., Shen, J., Ip, Y.T., and Xu, L. (2006). Identification of phosphatases for Smad in the  
723 BMP/DPP pathway. *Genes Dev* *20*, 648-653.
- 724 Connell-Crowley, L., Vo, D., Luke, L., and Giniger, E. (2007). *Drosophila* lacking the Cdk5 activator,  
725 p35, display defective axon guidance, age-dependent behavioral deficits and reduced lifespan.  
726 *Mechanisms of development* *124*, 341-349.
- 727 Das, A.K., Helps, N.R., Cohen, P.T., and Barford, D. (1996). Crystal structure of the protein  
728 serine/threonine phosphatase 2C at 2.0 Å resolution. *Embo j* *15*, 6798-6809.
- 729 Davies, S.P., Helps, N.R., Cohen, P.T., and Hardie, D.G. (1995). 5'-AMP inhibits dephosphorylation, as  
730 well as promoting phosphorylation, of the AMP-activated protein kinase. Studies using bacterially  
731 expressed human protein phosphatase-2C alpha and native bovine protein phosphatase-2AC.  
732 *FEBS Lett* *377*, 421-425.
- 733 Deka, B., and Singh, K. (2019). The arginine and serine-rich domains of Acinus modulate splicing. *Cell*  
734 *Biol Int* *43*, 954-959.
- 735 Dong, S., Wang, Q., Kao, Y.R., Diaz, A., Tasset, I., Kaushik, S., Thiruthuvanathan, V., Zintiridou, A.,  
736 Nieves, E., Dzieciatkowska, M., *et al.* (2021). Chaperone-mediated autophagy sustains  
737 haematopoietic stem-cell function. *Nature* *591*, 117-123.
- 738 Dunst, S., Kazimiers, T., von Zadow, F., Jambor, H., Sagner, A., Brankatschk, B., Mahmoud, A., Spann,  
739 S., Tomancak, P., Eaton, S., *et al.* (2015). Endogenously tagged rab proteins: a resource to study  
740 membrane trafficking in *Drosophila*. *Dev Cell* *33*, 351-365.

- 741 Evans, C.S., and Holzbaur, E.L.F. (2020). Quality Control in Neurons: Mitophagy and Other Selective  
742 Autophagy Mechanisms. *J Mol Biol* 432, 240-260.
- 743 Fleming, A., and Rubinsztein, D.C. (2020). Autophagy in Neuronal Development and Plasticity. *Trends*  
744 *Neurosci* 43, 767-779.
- 745 Galati, S., Boni, C., Gerra, M.C., Lazzaretti, M., and Buschini, A. (2019). Autophagy: A Player in  
746 response to Oxidative Stress and DNA Damage. *Oxid Med Cell Longev* 2019, 5692958.
- 747 Galluzzi, L., Baehrecke, E.H., Ballabio, A., Boya, P., Bravo-San Pedro, J.M., Cecconi, F., Choi, A.M.,  
748 Chu, C.T., Codogno, P., Colombo, M.I., *et al.* (2017). Molecular definitions of autophagy and  
749 related processes. *Embo j* 36, 1811-1836.
- 750 Gil-Ranedo, J., Gonzaga, E., Jaworek, K.J., Berger, C., Bossing, T., and Barros, C.S. (2019). STRIPAK  
751 Members Orchestrate Hippo and Insulin Receptor Signaling to Promote Neural Stem Cell  
752 Reactivation. *Cell Rep* 27, 2921-2933.e2925.
- 753 Gratz, S.J., Cummings, A.M., Nguyen, J.N., Hamm, D.C., Donohue, L.K., Harrison, M.M., Wildonger, J.,  
754 and O'Connor-Giles, K.M. (2013). Genome engineering of *Drosophila* with the CRISPR RNA-guided  
755 Cas9 nuclease. *Genetics* 194, 1029-1035.
- 756 Haberman, A.S., Akbar, M.A., Ray, S., and Krämer, H. (2010). *Drosophila acinus* encodes a novel  
757 regulator of endocytic and autophagic trafficking. *Development* 137, 2157-2166.
- 758 Hanada, M., Kobayashi, T., Ohnishi, M., Ikeda, S., Wang, H., Katsura, K., Yanagawa, Y., Hiraga, A.,  
759 Kanamaru, R., and Tamura, S. (1998). Selective suppression of stress-activated protein kinase  
760 pathway by protein phosphatase 2C in mammalian cells. *FEBS Lett* 437, 172-176.
- 761 Hanada, M., Ninomiya-Tsuji, J., Komaki, K., Ohnishi, M., Katsura, K., Kanamaru, R., Matsumoto, K.,  
762 and Tamura, S. (2001). Regulation of the TAK1 signaling pathway by protein phosphatase 2C. *J*  
763 *Biol Chem* 276, 5753-5759.
- 764 Hara, T., Nakamura, K., Matsui, M., Yamamoto, A., Nakahara, Y., Suzuki-Migishima, R., Yokoyama,  
765 M., Mishima, K., Saito, I., Okano, H., *et al.* (2006). Suppression of basal autophagy in neural cells  
766 causes neurodegenerative disease in mice. *Nature* 441, 885-889.
- 767 Hayashi, R., Handler, D., Ish-Horowicz, D., and Brennecke, J. (2014). The exon junction complex is  
768 required for definition and excision of neighboring introns in *Drosophila*. *Genes Dev* 28, 1772-  
769 1785.
- 770 Hu, Y., Yao, J., Liu, Z., Liu, X., Fu, H., and Ye, K. (2005). Akt phosphorylates acinus and inhibits its  
771 proteolytic cleavage, preventing chromatin condensation. *EMBO J* 24, 3543-3554.
- 772 Jaiswal, M., Sandoval, H., Zhang, K., Bayat, V., and Bellen, H.J. (2012). Probing mechanisms that  
773 underlie human neurodegenerative diseases in *Drosophila*. *Annual review of genetics* 46, 371-  
774 396.
- 775 Juhasz, G., Erdi, B., Sass, M., and Neufeld, T.P. (2007). Atg7-dependent autophagy promotes  
776 neuronal health, stress tolerance, and longevity but is dispensable for metamorphosis in  
777 *Drosophila*. *Genes Dev* 21, 3061-3066.
- 778 Kamada, R., Kudoh, F., Ito, S., Tani, I., Janairo, J.I.B., Omichinski, J.G., and Sakaguchi, K. (2020). Metal-  
779 dependent Ser/Thr protein phosphatase PPM family: Evolution, structures, diseases and  
780 inhibitors. *Pharmacol Ther*, 107622.
- 781 Kim, M., Semple, I., Kim, B., Kiers, A., Nam, S., Park, H.W., Park, H., Ro, S.H., Kim, J.S., Juhasz, G., *et al.*  
782 (2015). *Drosophila* Gyf/GRB10 interacting GYF protein is an autophagy regulator that controls  
783 neuron and muscle homeostasis. *Autophagy* 11, 1358-1372.

- 784 Klinman, E., and Holzbaur, E.L. (2015). Stress-Induced CDK5 Activation Disrupts Axonal Transport via  
785 Lis1/Ndel1/Dynein. *Cell Rep* *12*, 462-473.
- 786 Klionsky, D.J., Abdelmohsen, K., Abe, A., Abedin, M.J., Abeliovich, H., Acevedo Arozena, A., Adachi,  
787 H., Adams, C.M., Adams, P.D., Adeli, K., *et al.* (2016). Guidelines for the use and interpretation of  
788 assays for monitoring autophagy (3rd edition). *Autophagy* *12*, 1-222.
- 789 Komatsu, M., Waguri, S., Chiba, T., Murata, S., Iwata, J., Tanida, I., Ueno, T., Koike, M., Uchiyama, Y.,  
790 Kominami, E., *et al.* (2006). Loss of autophagy in the central nervous system causes  
791 neurodegeneration in mice. *Nature* *441*, 880-884.
- 792 Kroemer, G., Mariño, G., and Levine, B. (2010). Autophagy and the integrated stress response.  
793 *Molecular cell* *40*, 280-293.
- 794 Lai, K.O., and Ip, N.Y. (2015). Cdk5: a key player at neuronal synapse with diverse functions. *Mini*  
795 *reviews in medicinal chemistry* *15*, 390-395.
- 796 Levine, B., and Kroemer, G. (2019). Biological Functions of Autophagy Genes: A Disease Perspective.  
797 *Cell* *176*, 11-42.
- 798 Liang, Y., Pi, H., Liao, L., Tan, M., Deng, P., Yue, Y., Xi, Y., Tian, L., Xie, J., Chen, M., *et al.* (2021).  
799 Cadmium promotes breast cancer cell proliferation, migration and invasion by inhibiting  
800 ACS2/ATG5-mediated autophagy. *Environ Pollut* *273*, 116504.
- 801 Low, P., Varga, A., Piracs, K., Nagy, P., Szatmari, Z., Sass, M., and Juhasz, G. (2013). Impaired  
802 proteasomal degradation enhances autophagy via hypoxia signaling in *Drosophila*. *BMC Cell Biol*  
803 *14*, 29.
- 804 Maeda, T., Wurgler-Murphy, S.M., and Saito, H. (1994). A two-component system that regulates an  
805 osmosensing MAP kinase cascade in yeast. *Nature* *369*, 242-245.
- 806 Malone, C.D., Mestdagh, C., Akhtar, J., Kreim, N., Deinhard, P., Sachidanandam, R., Treisman, J., and  
807 Roignant, J.Y. (2014). The exon junction complex controls transposable element activity by  
808 ensuring faithful splicing of the piwi transcript. *Genes Dev* *28*, 1786-1799.
- 809 Mauvezin, C., Ayala, C., Braden, C.R., Kim, J., and Neufeld, T.P. (2014). Assays to monitor autophagy  
810 in *Drosophila*. *Methods* *68*, 134-139.
- 811 McLinden, K.A., Trunova, S., and Giniger, E. (2012). At the Fulcrum in Health and Disease: Cdk5 and  
812 the Balancing Acts of Neuronal Structure and Physiology. *Brain Disord Ther* *2012*, 001.
- 813 Memisoglu, G., Eapen, V.V., Yang, Y., Klionsky, D.J., and Haber, J.E. (2019). PP2C phosphatases  
814 promote autophagy by dephosphorylation of the Atg1 complex. *Proc Natl Acad Sci U S A* *116*,  
815 1613-1620.
- 816 Menzies, F.M., Fleming, A., Caricasole, A., Bento, C.F., Andrews, S.P., Ashkenazi, A., Fullgrave, J.,  
817 Jackson, A., Jimenez Sanchez, M., Karabiyik, C., *et al.* (2017). Autophagy and Neurodegeneration:  
818 Pathogenic Mechanisms and Therapeutic Opportunities. *Neuron* *93*, 1015-1034.
- 819 Menzies, F.M., Fleming, A., and Rubinsztein, D.C. (2015). Compromised autophagy and  
820 neurodegenerative diseases. *Nature reviews Neuroscience* *16*, 345-357.
- 821 Michelle, L., Cloutier, A., Toutant, J., Shkreta, L., Thibault, P., Durand, M., Garneau, D., Gendron, D.,  
822 Lapointe, E., Couture, S., *et al.* (2012). Proteins associated with the exon junction complex also  
823 control the alternative splicing of apoptotic regulators. *Mol Cell Biol* *32*, 954-967.
- 824 Mizushima, N. (2017). The exponential growth of autophagy-related research: from the humble  
825 yeast to the Nobel Prize. *FEBS Lett.*

- 826 Murachelli, A.G., Ebert, J., Basquin, C., Le Hir, H., and Conti, E. (2012). The structure of the ASAP core  
827 complex reveals the existence of a Pinin-containing PSAP complex. *Nature structural & molecular*  
828 *biology* *19*, 378-386.
- 829 Nakai, A., Yamaguchi, O., Takeda, T., Higuchi, Y., Hikoso, S., Taniike, M., Omiya, S., Mizote, I.,  
830 Matsumura, Y., Asahi, M., *et al.* (2007). The role of autophagy in cardiomyocytes in the basal state  
831 and in response to hemodynamic stress. *Nat Med* *13*, 619-624.
- 832 Nandi, N., and Krämer, H. (2018). Cdk5-mediated Acn/Acinus phosphorylation regulates basal  
833 autophagy independently of metabolic stress. *Autophagy* *14*, 1271-1272.
- 834 Nandi, N., Tyra, L.K., Stenesen, D., and Krämer, H. (2014). Acinus integrates AKT1 and subapoptotic  
835 caspase activities to regulate basal autophagy. *The Journal of cell biology* *207*, 253-268.
- 836 Nandi, N., Tyra, L.K., Stenesen, D., and Krämer, H. (2017). Stress-induced Cdk5 activity enhances  
837 cytoprotective basal autophagy in *Drosophila melanogaster* by phosphorylating acinus at  
838 serine(437). *eLife* *6*, pii: e30760.
- 839 Neal, S.J., Zhou, Q., and Pignoni, F. (2020). STRIPAK-PP2A regulates Hippo-Yorkie signaling to  
840 suppress retinal fate in the *Drosophila* eye disc peripodial epithelium. *J Cell Sci* *133*.
- 841 Numrich, J., and Ungermann, C. (2014). Endocytic Rabs in membrane trafficking and signaling. *Biol*  
842 *Chem* *395*, 327-333.
- 843 Orvedahl, A., Sumpter, R., Jr., Xiao, G., Ng, A., Zou, Z., Tang, Y., Narimatsu, M., Gilpin, C., Sun, Q.,  
844 Roth, M., *et al.* (2011). Image-based genome-wide siRNA screen identifies selective autophagy  
845 factors. *Nature* *480*, 113-117.
- 846 Pan, C., Liu, H.D., Gong, Z., Yu, X., Hou, X.B., Xie, D.D., Zhu, X.B., Li, H.W., Tang, J.Y., Xu, Y.F., *et al.*  
847 (2013). Cadmium is a potent inhibitor of PPM phosphatases and targets the M1 binding site. *Sci*  
848 *Rep* *3*, 2333.
- 849 Ravikumar, B., Vacher, C., Berger, Z., Davies, J.E., Luo, S., Oroz, L.G., Scaravilli, F., Easton, D.F., Duden,  
850 R., O'Kane, C.J., *et al.* (2004). Inhibition of mTOR induces autophagy and reduces toxicity of  
851 polyglutamine expansions in fly and mouse models of Huntington disease. *Nature genetics* *36*,  
852 585-595.
- 853 Ribeiro, P.S., Josué, F., Wepf, A., Wehr, M.C., Rinner, O., Kelly, G., Tapon, N., and Gstaiger, M. (2010).  
854 Combined functional genomic and proteomic approaches identify a PP2A complex as a negative  
855 regulator of Hippo signaling. *Mol Cell* *39*, 521-534.
- 856 Rodor, J., Pan, Q., Blencowe, B.J., Eyra, E., and Caceres, J.F. (2016). The RNA-binding profile of  
857 Acinus, a peripheral component of the exon junction complex, reveals its role in splicing  
858 regulation. *RNA (New York, NY)* *22*, 1411-1426.
- 859 Rosa-Ferreira, C., Sweeney, S.T., and Munro, S. (2018). The small G protein Arl8 contributes to  
860 lysosomal function and long-range axonal transport in *Drosophila*. *Biol Open* *7*.
- 861 Rusten, T.E., Lindmo, K., Juhasz, G., Sass, M., Seglen, P.O., Brech, A., and Stenmark, H. (2004).  
862 Programmed autophagy in the *Drosophila* fat body is induced by ecdysone through regulation of  
863 the PI3K pathway. *Dev Cell* *7*, 179-192.
- 864 Schwerk, C., Prasad, J., Degenhardt, K., Erdjument-Bromage, H., White, E., Tempst, P., Kidd, V.J.,  
865 Manley, J.L., Lahti, J.M., and Reinberg, D. (2003). ASAP, a novel protein complex involved in RNA  
866 processing and apoptosis. *Mol Cell Biol* *23*, 2981-2990.
- 867 Scott, R.C., Schuldiner, O., and Neufeld, T.P. (2004). Role and regulation of starvation-induced  
868 autophagy in the *Drosophila* fat body. *Dev Cell* *7*, 167-178.

- 869 Shearin, H.K., Macdonald, I.S., Spector, L.P., and Stowers, R.S. (2014). Hexameric GFP and mCherry  
870 reporters for the Drosophila GAL4, Q, and LexA transcription systems. *Genetics* 196, 951-960.
- 871 Shi, Y. (2009). Serine/threonine phosphatases: mechanism through structure. *Cell* 139, 468-484.
- 872 Shiozaki, K., Akhavan-Niaki, H., McGowan, C.H., and Russell, P. (1994). Protein phosphatase 2C,  
873 encoded by *ptc1+*, is important in the heat shock response of *Schizosaccharomyces pombe*. *Mol*  
874 *Cell Biol* 14, 3742-3751.
- 875 Shukla, A.K., and Giniger, E. (2019). Reduced autophagy efficiency induces innate immune activation  
876 leading to neurodegeneration. *Autophagy* 15, 1117-1119.
- 877 Singh, K.K., Erkelenz, S., Rattay, S., Dehof, A.K., Hildebrandt, A., Schulze-Osthoff, K., Schaal, H., and  
878 Schwerk, C. (2010). Human SAP18 mediates assembly of a splicing regulatory multiprotein  
879 complex via its ubiquitin-like fold. *RNA (New York, NY)* 16, 2442-2454.
- 880 So, K.Y., Lee, B.H., and Oh, S.H. (2018). The critical role of autophagy in cadmium-induced  
881 immunosuppression regulated by endoplasmic reticulum stress-mediated calpain activation in  
882 RAW264.7 mouse monocytes. *Toxicology* 393, 15-25.
- 883 Steffan, J.S., Bodai, L., Pallos, J., Poelman, M., McCampbell, A., Apostol, B.L., Kazantsev, A., Schmidt,  
884 E., Zhu, Y.Z., Greenwald, M., *et al.* (2001). Histone deacetylase inhibitors arrest polyglutamine-  
885 dependent neurodegeneration in *Drosophila*. *Nature* 413, 739-743.
- 886 Stenesen, D., Moehlman, A.T., and Kramer, H. (2015). The carcinine transporter CarT is required in  
887 *Drosophila* photoreceptor neurons to sustain histamine recycling. *eLife* 4, e10972.
- 888 Su, S.C., and Tsai, L.H. (2011). Cyclin-dependent kinases in brain development and disease. *Annu Rev*  
889 *Cell Dev Biol* 27, 465-491.
- 890 Takekawa, M., Maeda, T., and Saito, H. (1998). Protein phosphatase 2 $\alpha$  inhibits the human  
891 stress-responsive p38 and JNK MAPK pathways. *Embo j* 17, 4744-4752.
- 892 Tang, D., Yeung, J., Lee, K.Y., Matsushita, M., Matsui, H., Tomizawa, K., Hatase, O., and Wang, J.H.  
893 (1995). An isoform of the neuronal cyclin-dependent kinase 5 (Cdk5) activator. *J Biol Chem* 270,  
894 26897-26903.
- 895 Templeton, D.M., and Liu, Y. (2010). Multiple roles of cadmium in cell death and survival. *Chem Biol*  
896 *Interact* 188, 267-275.
- 897 Tong, Y., Quirion, R., and Shen, S.H. (1998). Cloning and characterization of a novel mammalian PP2C  
898 isozyme. *J Biol Chem* 273, 35282-35290.
- 899 Torii, S., Yoshida, T., Arakawa, S., Honda, S., Nakanishi, A., and Shimizu, S. (2016). Identification of  
900 PPM1D as an essential Ulk1 phosphatase for genotoxic stress-induced autophagy. *EMBO Rep* 17,  
901 1552-1564.
- 902 Tyra, L.K., Nandi, N., Tracy, C., and Krämer, H. (2020). Yorkie Growth-Promoting Activity Is Limited by  
903 Atg1-Mediated Phosphorylation. *Dev Cell* 52, 605-616.e607.
- 904 Venken, K.J., He, Y., Hoskins, R.A., and Bellen, H.J. (2006). P[acman]: a BAC transgenic platform for  
905 targeted insertion of large DNA fragments in *D. melanogaster*. *Science* 314, 1747-1751.
- 906 WHO (2020). Preventing Disease through Healthy Environments: Ten Chemicals of Major Public  
907 Health Concern; Geneva, Switzerland. . In *Public Environment*, World Health Organization  
908 ([https://www.who.int/ipcs/assessment/public\\_health/chemicals\\_phc/en/](https://www.who.int/ipcs/assessment/public_health/chemicals_phc/en/)). (accessed 5-16-21)  
909 WHO).
- 910 Xu, Z., Tito, A.J., Rui, Y.N., and Zhang, S. (2015). Studying polyglutamine diseases in *Drosophila*. *Exp*  
911 *Neurol* 274, 25-41.

- 912 Yang, Y., Primrose, D.A., Leung, A.C., Fitzsimmons, R.B., McDermand, M.C., Missellbrook, A., Haskins,  
913 J., Smylie, A.S., and Hughes, S.C. (2012). The PP1 phosphatase flapwing regulates the activity of  
914 Merlin and Moesin in *Drosophila*. *Dev Biol* *361*, 412-426.
- 915 Yun, H.R., Jo, Y.H., Kim, J., Shin, Y., Kim, S.S., and Choi, T.G. (2020). Roles of Autophagy in Oxidative  
916 Stress. *Int J Mol Sci* *21*.
- 917 Zhang, Z., Miah, M., Culbreth, M., and Aschner, M. (2016). Autophagy in Neurodegenerative  
918 Diseases and Metal Neurotoxicity. *Neurochem Res* *41*, 409-422.
- 919
